# Supplementary material for: Metal-free tandem reaction synthesis of spiro-cyclopropyl fused pyrazolin-5-one derivatives
Source: Royal Society of Chemistry journal article supplement (doi:10.1039/c8qo01378k), 2019-01-01

**Supporting Information for**  
**Metal-Free Tandem Reaction Synthesis of Spiro-cyclopropyl**  
**Fused Pyrazolin-5-one Derivatives**

Man Liu, Chen-Fei Liu, Jing Zhang, Yan-Jun Xu\* and Lin Dong\*

**Table of Contents**

- 1. General Methods**
- 2. General Procedure for Synthesis of Spiropyrazolone 3aa**
- 3. Synthetic Application of Spiropyrazolone 3aa**
- 4. Determination of Products by LCMS Data**
- 5. Experimental Section**
- 6. The Scope of *N*-arylpyrazol-5-ones and Sulfoxonium Ylides**
- 7. Characterization Data for Pyrazolin-5-one Derivatives**
- 8. NMR Spectra of Pyrazolin-5-one Derivatives**

## 1. General Methods

NMR data were obtained for  $^1\text{H}$  at 400 MHz or 600 MHz, and for  $^{13}\text{C}$  at 100 MHz or 151 MHz. Chemical shifts were reported in ppm from tetramethylsilane with the solvent resonance as the internal standard in  $\text{CDCl}_3$  solution. ESI HRMS was recorded on a Waters SYNAPT G2 and Water XEVO G2 Q-ToF. UV detection was monitored at 220 nm. The UV-vis spectra were recorded on a Shimadzu UV-2450 spectrometer. TLC was performed on glass-backed silica plates. 3-methyl-1-phenyl-1H-pyrazol-5(4H)-one was commercially available, other pyrazolones and sulfoxonium ylides were prepared according to the literature procedures.<sup>1,2</sup> 3-methyl-5-phenyl-1H-pyrazole-4,5-dione **5** and unsaturated pyrazolone **6** were prepared according to the literature procedures<sup>3,4</sup>.

## 2. General Procedure for Synthesis of Spiropyrazolone Product 3aa

3-methyl-1-phenyl-1H-pyrazol-5(4H)-one **1a** (8.7 mg, 0.05 mmol) and sulfoxonium ylide **2a** (29.4 mg, 3.0 equiv.) and *p*-nitrobenzoic acid (25.2 mg, 3.0 equiv.) were stirred in toluene (0.5 mL) at 120 °C for 12 h. After completion, the mixture was concentrated under vacuum and purified by flash chromatography eluting with ethyl acetate and petroleum ether (1:10) to give the product **3aa** as light yellow oil (19.0 mg, 93%).

## 3. Synthetic Application of Spiropyrazolone Product 3aa

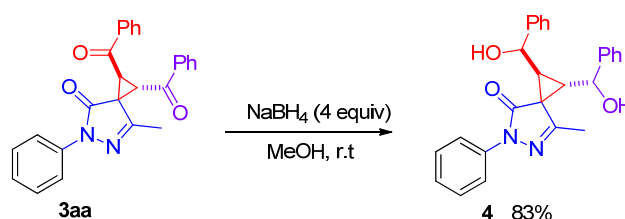

1,2-bis(hydroxy(phenyl)methyl)-7-methyl-5-phenyl-5,6-diazaspiro[2.4]hept-6-en-4-one **4**: To a solution of the product **3aa** (20.4 mg, 0.05 mmol) in anhydrous MeOH (1 mL) was added  $\text{NaBH}_4$  (7.6 mg, 4 equiv) in small portions. The resulting solution was stirred at room temperature for 5 min. After completion, the reaction mixture was separated and extracted with ethyl acetate (5 mL  $\times$  3). The combined organic layers were washed with brine and dried over anhydrous  $\text{Na}_2\text{SO}_4$ . Concentration in vacuo and purification by column chromatography afforded the **4** (17.1 mg, 83%) as a white solid.

## 4. Determination of Products by LCMS Data

The intermediate **II** (or intermediate **IV**) and **V** could be observed by LCMS when **1a** and **2a** reacted under standard conditions for 1 h.

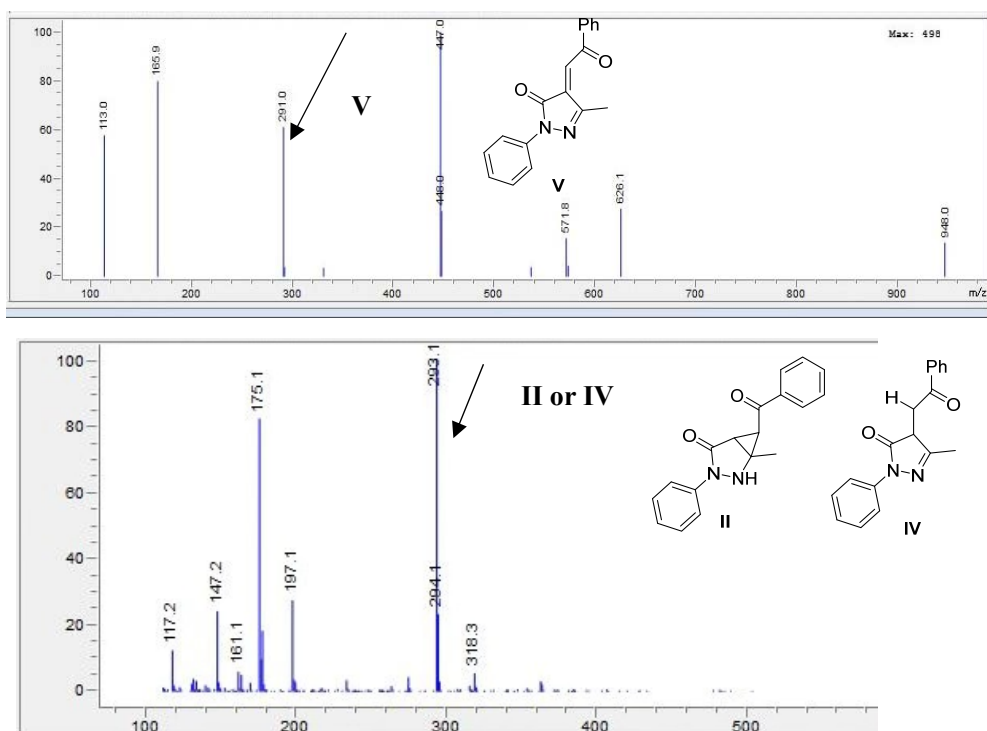

## 5. Experimental Section

Table S1. Screening of bases.<sup>a</sup>

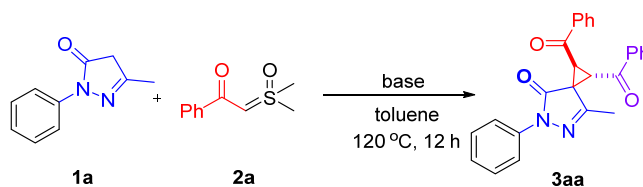

| entry | base/equiv                               | yield (%) <sup>b</sup> <b>3aa</b> |
|-------|------------------------------------------|-----------------------------------|
| 1     | NaOAc/1                                  | 13                                |
| 2     | KOAc/1                                   | ND                                |
| 3     | LiOAc.H <sub>2</sub> O/1                 | ND                                |
| 4     | Zn(OAc) <sub>2</sub> .H <sub>2</sub> O/1 | ND                                |
| 5     | t-BuOK/1                                 | ND                                |
| 6     | K <sub>2</sub> CO <sub>3</sub> /1        | ND                                |
| 7     | Ca(OH) <sub>2</sub> /1                   | ND                                |

<sup>a</sup> Reaction conditions unless otherwise specified: 0.05 mmol of **1a**, 3.0 equiv. of **2a**, 0.5 mL of toluene, 120 °C, under air, 12 h. <sup>b</sup>

Isolated yield

Table S2. Screening of acids.<sup>a</sup>

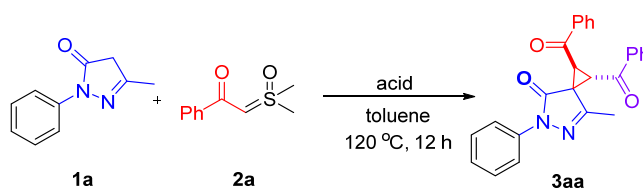

| entry | base/equiv                        | yield (%) <sup>b</sup> <b>3aa</b> |
|-------|-----------------------------------|-----------------------------------|
| 1     | 4-(Trifluoromethyl)benzoic acid/1 | 62                                |
| 2     | 4-Cyanobenzoic acid/1             | 55                                |
| 3     | Terephthalic acid/1               | 50                                |
| 4     | 2-Nitrophenylacetic acid/1        | 34                                |
| 5     | 3-Hydroxypivalic acid/1           | 47                                |
| 6     | HOAc/1                            | 39                                |
| 7     | Citric acid/1                     | 48                                |
| 8     | Cyanoacetic acid/1                | 31                                |

<sup>a</sup> Reaction conditions unless otherwise specified: 0.05 mmol of **1a**, 3.0 equiv. of **2a**, 0.5 mL of toluene, 120 °C, under air, 12 h. <sup>b</sup> Isolated yield

## 6. The Scope of *N*-arylpyrazol-5-ones<sup>a</sup>

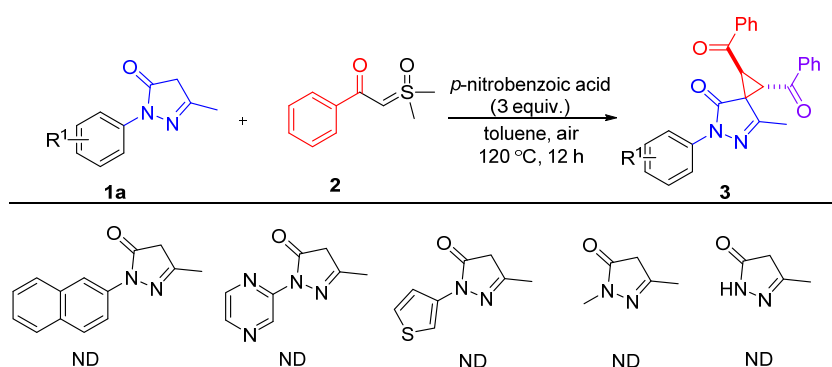

**Scheme S1:**<sup>a</sup> Unless otherwise mentioned all reactions were performed with 0.05 mmol of **1a**, 3.0 equiv. of **2**, 3.0 equiv. of *p*-nitrobenzoic acid, toluene (0.5 mL), 120 °C, 12 h, under air. Isolated yield

## The Scope of Sulfoxonium Ylides<sup>a</sup>

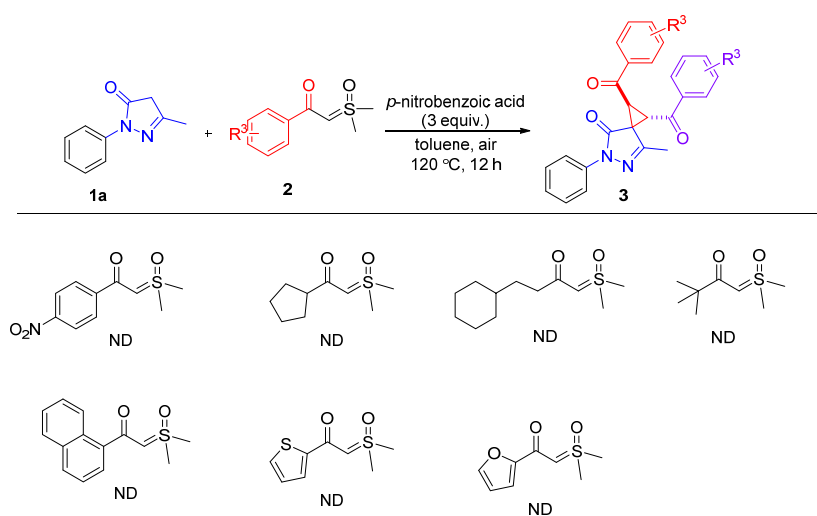

**Scheme S2:**<sup>a</sup> Unless otherwise mentioned all reactions were performed with 0.05 mmol of **1a**, 3.0 equiv. of **2**, 3.0 equiv. of *p*-nitrobenzoic acid, toluene (0.5 mL), 120 °C, 12 h, under air. Isolated yield

## 7. Characterization Data for Pyrazolin-5-one Derivatives

(4-methyl-7-oxo-6-phenyl-5,6-diazaspiro[2.4]hept-4-ene-1,2-diyl)bis(phenylmethanone) (**3aa**). Light yellow oil, 12 h, 19.0 mg, 93% yield; <sup>1</sup>H NMR (400 MHz, CDCl<sub>3</sub>): δ = 8.04-8.02 (s, 1H), 7.79

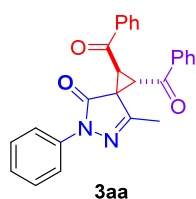

(dd,  $J_1 = 8.8$  Hz,  $J_2 = 1.2$  Hz, 2H), 7.64 (t,  $J = 7.6$  Hz, 1H), 7.56 (t,  $J = 7.2$  Hz, 1H), 7.50 (t,  $J = 7.6$  Hz, 2H), 7.44 (t,  $J = 8.0$  Hz, 2H), 7.33 (t,  $J = 8.4$  Hz, 2H), 7.29 (dd,  $J_1 = 7.6$  Hz,  $J_2 = 0.8$  Hz, 1H), 7.14 (t,  $J = 7.2$  Hz, 1H), 4.35 (d,  $J = 8.0$  Hz, 1H), 4.25 (d,  $J = 8.0$  Hz, 1H), 2.09 (s, 3H) ppm. <sup>13</sup>C NMR (100 MHz, CDCl<sub>3</sub>): δ = 191.1, 188.8, 166.8, 155.0, 137.9, 135.7, 135.7, 134.6, 134.0, 129.1, 129.0, 128.8, 128.8, 128.4, 125.2, 118.6, 45.0, 39.2, 38.3, 15.1 ppm. ESI HRMS: calcd. for C<sub>26</sub>H<sub>20</sub>N<sub>2</sub>O<sub>3</sub>+H 409.1552, found 409.1555.

(4-methyl-7-oxo-6-(p-tolyl)-5,6-diazaspiro[2.4]hept-4-ene-1,2-diyl)bis(phenylmethanone) (**3ba**).

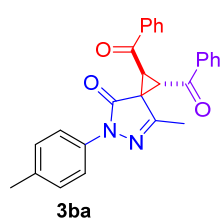

Yellow oil, 12 h, 15.4 mg, 73% yield; <sup>1</sup>H NMR (400 MHz, CDCl<sub>3</sub>): δ = 8.03 (d,  $J = 7.8$  Hz, 2H), 7.86 (d,  $J = 7.2$  Hz, 2H), 7.65-7.62 (m, 3H), 7.55 (t,  $J = 7.2$  Hz, 1H), 7.50 (t,  $J = 7.8$  Hz, 2H), 7.44 (t,  $J = 7.2$  Hz, 2H), 7.13 (t,  $J = 8.4$  Hz, 2H), 4.33 (d,  $J = 8.4$  Hz, 1H), 4.23 (d,  $J = 8.4$  Hz, 1H), 2.30 (s, 3H), 2.07 (s, 3H) ppm. <sup>13</sup>C NMR (100 MHz, CDCl<sub>3</sub>): δ = 190.6, 188.4, 166.9, 155.2, 145.0, 138.0, 133.3, 133.3, 129.8, 129.6, 128.9, 128.8, 128.5, 125.1, 118.6,

44.9, 39.3, 38.4, 21.7, 21.7, 15.1 ppm. ESI HRMS: calcd. for C<sub>27</sub>H<sub>22</sub>N<sub>2</sub>O<sub>3</sub>+H 423.1709, found 423.1711.

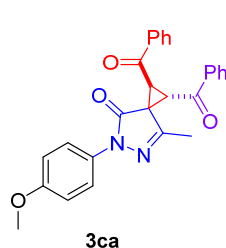

(6-(4-methoxyphenyl)-4-methyl-7-oxo-5,6-diazaspiro[2.4]hept-4-ene-1,2-diyl)bis(phenylmethanone) (**3ca**). Yellow oil, 12 h, 7.9 mg, 36% yield; <sup>1</sup>H NMR (400 MHz, CDCl<sub>3</sub>): δ = 7.97-7.94 (m, 2H), 7.80-7.77 (m, 2H), 7.64 (t,  $J = 7.6$  Hz, 1H), 7.59-7.55 (m, 3H), 7.49 (t,  $J = 7.6$  Hz, 1H), 7.43 (t,  $J = 7.6$  Hz, 2H), 7.37 (t,  $J = 7.6$  Hz, 2H), 6.80-6.76 (m, 2H), 4.26 (d,  $J = 8.4$  Hz, 1H), 4.16 (d,  $J = 8.4$  Hz, 1H), 3.70 (s, 3H), 2.09 (s, 3H) ppm. <sup>13</sup>C NMR (100 MHz, CDCl<sub>3</sub>): δ = 191.2, 188.9, 166.4, 157.1, 154.8, 135.7, 134.0, 131.3, 129.1,

128.9, 128.4, 120.5, 113.9, 55.4, 44.9, 39.0, 38.2, 15.1 ppm. ESI HRMS: calcd. for C<sub>27</sub>H<sub>22</sub>N<sub>2</sub>O<sub>4</sub>+Na 461.1477, found 461.1476.

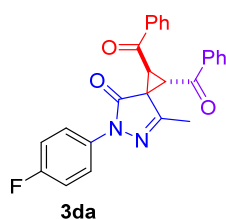

(6-(4-fluorophenyl)-4-methyl-7-oxo-5,6-diazaspiro[2.4]hept-4-ene-1,2-diyl)bis(phenylmethanone) (**3da**). Yellow oil, 12 h, 16.0 mg, 75% yield; <sup>1</sup>H NMR (600 MHz, CDCl<sub>3</sub>): δ = 8.03 (d,  $J = 7.2$  Hz, 2H), 7.86 (d,  $J = 7.8$  Hz, 2H), 7.76-7.74 (m, 2H), 7.64 (t,  $J = 7.2$  Hz, 1H), 7.57 (t,  $J = 7.2$  Hz, 1H), 7.51 (t,  $J = 7.8$  Hz, 2H), 7.45 (t,  $J = 7.8$  Hz, 2H), 7.01 (t,  $J = 9.0$  Hz, 2H), 4.34 (d,  $J = 7.8$  Hz, 1H), 4.25 (d,  $J = 7.8$  Hz, 1H), 2.09 (s, 3H) ppm. <sup>13</sup>C NMR (100

MHz, CDCl<sub>3</sub>): δ = 191.0, 188.7, 176.4, 166.7, 159.9 ( $J_{CF} = 243.4$  Hz), 155.2, 135.7 ( $J_{CF} = 4.1$  Hz), 134.6, 134.1, 129.1, 129.0, 128.8, 128.4, 120.5 ( $J_{CF} = 8.0$  Hz), 115.5 ( $J_{CF} = 22.5$  Hz), 44.8, 39.2, 38.4, 15.1 ppm. ESI HRMS: calcd. for C<sub>26</sub>H<sub>19</sub>FN<sub>2</sub>O<sub>3</sub>+Na 449.1277, found 449.1277.

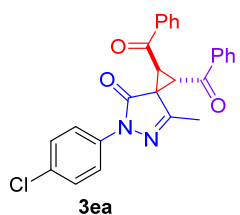

(6-(4-chlorophenyl)-4-methyl-7-oxo-5,6-diazaspiro[2.4]hept-4-ene-1,2-diyl)bis(phenylmethanone) (**3ea**). Yellow oil, 12 h, 14.1 mg, 64% yield;  $^1\text{H}$  NMR (600 MHz,  $\text{CDCl}_3$ ):  $\delta$  = 8.02 (d,  $J$  = 7.8 Hz, 2H), 7.86 (d,  $J$  = 7.8 Hz, 2H), 7.77 (d,  $J$  = 9.0 Hz, 2H), 7.64 (t,  $J$  = 7.2 Hz, 1H), 7.56 (t,  $J$  = 7.8 Hz, 1H), 7.50 (t,  $J$  = 7.8 Hz, 2H), 7.44 (t,  $J$  = 7.8 Hz, 2H), 7.28 (t,  $J$  = 9.0 Hz, 2H), 4.34 (d,  $J$  = 8.4 Hz, 1H), 4.25 (d,  $J$  = 8.4 Hz, 1H), 2.08 (s, 3H) ppm.  $^{13}\text{C}$  NMR (100 MHz,  $\text{CDCl}_3$ ):  $\delta$  = 190.9, 188.6, 166.8, 155.4, 136.5, 135.7, 135.6, 134.6, 134.1, 130.3, 129.1, 129.0, 128.8, 128.8, 128.4, 119.7, 44.9, 39.3, 38.5, 15.2 ppm. ESI HRMS: calcd. for  $\text{C}_{26}\text{H}_{19}\text{ClN}_2\text{O}_3+\text{H}$  465.0982, found 465.0979.

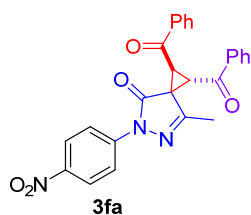

(4-methyl-6-(4-nitrophenyl)-7-oxo-5,6-diazaspiro[2.4]hept-4-ene-1,2-diyl)bis(phenylmethanone) (**3fa**). Yellow oil, 12 h, 14.3 mg, 63% yield;  $^1\text{H}$  NMR (600 MHz,  $\text{CDCl}_3$ ):  $\delta$  = 8.21 (d,  $J$  = 9.6 Hz, 2H), 8.07 (d,  $J$  = 9.0 Hz, 2H), 8.03 (d,  $J$  = 7.8 Hz, 2H), 7.88 (d,  $J$  = 7.2 Hz, 2H), 7.66 (t,  $J$  = 7.8 Hz, 1H), 7.58 (t,  $J$  = 7.2 Hz, 1H), 7.52 (t,  $J$  = 7.8 Hz, 2H), 7.46 (t,  $J$  = 7.8 Hz, 2H), 4.38 (d,  $J$  = 8.4 Hz, 1H), 4.31 (d,  $J$  = 8.4 Hz, 1H), 2.12 (s, 3H) ppm.  $^{13}\text{C}$  NMR (100 MHz,  $\text{CDCl}_3$ ):  $\delta$  = 190.6, 188.2, 167.5, 156.6, 144.1, 142.8, 135.5, 135.5, 134.8, 134.3, 129.2, 129.1, 128.8, 128.4, 124.8, 117.8, 44.8, 39.8, 38.9, 15.3 ppm. ESI HRMS: calcd. for  $\text{C}_{26}\text{H}_{19}\text{N}_3\text{O}_5+\text{H}$  454.1403, found 454.1404.

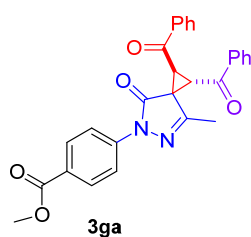

methyl 4-(1,2-dibenzoyl-7-methyl-4-oxo-5,6-diazaspiro[2.4]hept-6-en-5-yl)benzoate (**3ga**). Yellow oil, 12 h, 14.9 mg, 64% yield;  $^1\text{H}$  NMR (600 MHz,  $\text{CDCl}_3$ ):  $\delta$  = 8.02 (t,  $J$  = 8.4 Hz, 4H), 7.94 (d,  $J$  = 8.4 Hz, 2H), 7.87 (d,  $J$  = 7.8 Hz, 2H), 7.65 (t,  $J$  = 7.8 Hz, 1H), 7.57 (t,  $J$  = 7.2 Hz, 1H), 7.51 (t,  $J$  = 7.8 Hz, 2H), 7.45 (t,  $J$  = 7.8 Hz, 2H), 4.36 (d,  $J$  = 8.4 Hz, 1H), 4.28 (d,  $J$  = 8.4 Hz, 1H), 3.88 (s, 3H), 2.10 (s, 3H) ppm.  $^{13}\text{C}$  NMR (100 MHz,  $\text{CDCl}_3$ ):  $\delta$  = 190.8, 188.5, 167.2, 166.5, 155.8, 135.6, 134.7, 134.1, 130.5, 129.2, 129.0, 128.8, 128.4, 117.6, 52.0, 44.9, 39.5, 38.6, 15.2 ppm. ESI HRMS: calcd. for  $\text{C}_{28}\text{H}_{22}\text{N}_2\text{O}_5+\text{H}$  467.1607, found 467.1607.

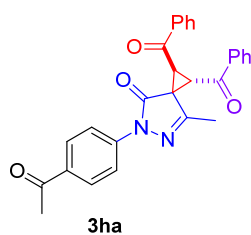

(6-(4-acetylphenyl)-4-methyl-7-oxo-5,6-diazaspiro[2.4]hept-4-ene-1,2-diyl)bis(phenylmethanone) (**3ha**). Yellow oil, 12 h, 11.5 mg, 51% yield;  $^1\text{H}$  NMR (600 MHz,  $\text{CDCl}_3$ ):  $\delta$  = 8.03 (d,  $J$  = 7.2 Hz, 2H), 7.97-7.93 (m, 4H), 7.87 (d,  $J$  = 7.8 Hz, 2H), 7.65 (t,  $J$  = 7.8 Hz, 1H), 7.57 (t,  $J$  = 7.2 Hz, 1H), 7.51 (t,  $J$  = 7.8 Hz, 2H), 7.45 (t,  $J$  = 7.8 Hz, 2H), 4.37 (d,  $J$  = 8.4 Hz, 1H), 4.29 (d,  $J$  = 8.4 Hz, 1H), 2.56 (s, 3H), 2.11 (s, 3H) ppm.  $^{13}\text{C}$  NMR (100 MHz,  $\text{CDCl}_3$ ):  $\delta$  = 196.9, 190.8, 188.5, 167.2, 155.9, 135.6, 134.7, 134.2, 129.4, 129.2, 129.0, 128.8, 128.4, 117.7, 44.9, 39.5, 38.6, 26.4, 15.2 ppm. ESI HRMS: calcd. for  $\text{C}_{28}\text{H}_{22}\text{N}_2\text{O}_4+\text{H}$  451.1658, found 451.1657.

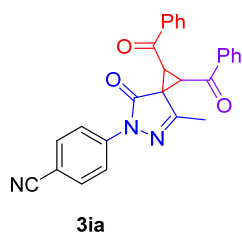

4-(1,2-dibenzoyl-7-methyl-4-oxo-5,6-diazaspiro[2.4]hept-6-en-5-yl) benzonitrile (**3ia**). Yellow oil, 12 h, 16.0 mg, 74% yield;  $^1\text{H NMR}$  (400 MHz,  $\text{CDCl}_3$ ):  $\delta$  = 8.03-8.00 (m, 4H), 7.88-7.86 (m, 2H), 7.65-7.61 (m, 3H), 7.57 (d,  $J$  = 7.2 Hz, 1H), 7.50 (t,  $J$  = 8.0 Hz, 2H), 7.45 (t,  $J$  = 7.6 Hz, 2H), 4.36 (d,  $J$  = 8.4 Hz, 1H), 4.29 (d,  $J$  = 8.4 Hz, 1H), 2.11 (s, 3H) ppm.  $^{13}\text{C NMR}$  (100 MHz,  $\text{CDCl}_3$ ):  $\delta$  = 190.6 188.3, 167.4, 156.3, 134.8, 134.2, 133.0, 129.2, 129.0, 128.8, 128.4, 118.7, 118.2, 108.1, 44.9, 39.7, 38.8, 15.2 ppm. ESI HRMS: calcd. for  $\text{C}_{27}\text{H}_{19}\text{N}_3\text{O}_3+\text{H}$  434.1505, found 434.1502.

(4-methyl-7-oxo-6-(*m*-tolyl)-5,6-diazaspiro[2.4]hept-4-ene-1,2-diyl)bis(phenylmethanone) (**3ja**).

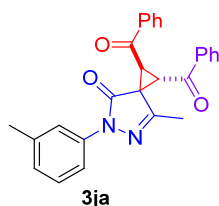

Yellow oil, 12 h, 15.0 mg, 71% yield;  $^1\text{H NMR}$  (400 MHz,  $\text{CDCl}_3$ ):  $\delta$  = 8.05 (d,  $J$  = 7.6 Hz, 2H), 7.89 (d,  $J$  = 7.2 Hz, 2H), 7.68-7.65 (m, 2H), 7.59 (t,  $J$  = 7.6 Hz, 2H), 7.53 (t,  $J$  = 7.6 Hz, 2H), 7.47 (t,  $J$  = 7.6 Hz, 2H), 7.28-7.23 (m, 1H), 6.99 (d,  $J$  = 7.6 Hz, 1H), 4.37 (d,  $J$  = 8.0 Hz, 1H), 4.28 (d,  $J$  = 8.0 Hz, 1H), 2.35 (s, 3H), 2.11 (s, 3H) ppm.  $^{13}\text{C NMR}$  (100 MHz,  $\text{CDCl}_3$ ):  $\delta$  = 191.1, 188.8, 166.8, 154.9, 138.8, 137.9, 135.7, 135.7, 134.6, 134.0, 129.1, 129.0, 128.8, 128.6, 128.4, 126.1, 119.2, 115.7, 45.0, 39.2, 38.2, 21.5, 15.1 ppm. ESI HRMS: calcd. for  $\text{C}_{27}\text{H}_{22}\text{N}_2\text{O}_3+\text{Na}$  445.1528, found 445.1528.

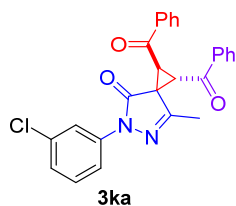

(6-(3-chlorophenyl)-4-methyl-7-oxo-5,6-diazaspiro[2.4]hept-4-ene-1,2-diyl)bis(phenylmethanone) (**3ka**). Yellow oil, 12 h, 15.0 mg, 68% yield;  $^1\text{H NMR}$  (400 MHz,  $\text{CDCl}_3$ ):  $\delta$  = 7.96-7.93 (m, 2H), 7.82 (t,  $J$  = 2.0 Hz, 1H), 7.80-7.78 (m, 2H), 7.69-7.66 (m, 1H), 7.57 (t,  $J$  = 7.2 Hz, 1H), 7.50 (t,  $J$  = 7.2 Hz, 1H), 7.43 (t,  $J$  = 2.0 Hz, 2H), 7.37 (t,  $J$  = 7.6 Hz, 2H), 7.19-7.15 (m, 1H), 7.05-7.02 (m, 1H), 4.28 (d,  $J$  = 8.4 Hz, 1H), 4.19 (d,  $J$  = 8.4 Hz, 1H), 2.01 (s, 3H) ppm.  $^{13}\text{C NMR}$  (100 MHz,  $\text{CDCl}_3$ ):  $\delta$  = 190.9, 188.5, 166.9, 155.5, 138.9, 135.6, 135.6, 134.7, 134.6, 134.1, 129.9, 129.2, 129.0, 128.8, 128.4, 125.1, 118.5, 116.3, 44.9, 39.4, 38.5, 15.1 ppm. ESI HRMS: calcd. for  $\text{C}_{26}\text{H}_{19}\text{ClN}_2\text{O}_3+\text{Na}$  465.0982, found 465.0988.

(4-ethyl-7-oxo-6-phenyl-5,6-diazaspiro[2.4]hept-4-ene-1,2-diyl)bis(phenylmethanone) (**3ma**).

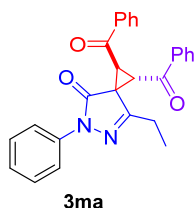

Yellow oil, 12 h, 12.4 mg, 59% yield;  $^1\text{H NMR}$  (400 MHz,  $\text{CDCl}_3$ ):  $\delta$  = 7.95-7.93 (m, 2H), 7.84-7.75 (m, 4H), 7.56 (tt,  $J_1$  = 7.2 Hz,  $J_2$  = 1.2 Hz, 1H), 7.48 (tt,  $J_1$  = 7.6 Hz,  $J_2$  = 1.2 Hz, 1H), 7.42 (t,  $J$  = 8.0 Hz, 2H), 7.36 (t,  $J$  = 8.0 Hz, 2H), 7.29-7.24 (m, 2H), 7.07 (tt,  $J_1$  = 8.4 Hz,  $J_2$  = 1.2 Hz, 1H), 4.24 (d,  $J$  = 8.0 Hz, 1H), 4.17 (d,  $J$  = 8.0 Hz, 1H), 2.37-2.29 (m, 1H), 2.17-2.07 (m, 1H), 1.20 (t,  $J$  = 7.2 Hz, 3H) ppm.  $^{13}\text{C NMR}$  (100 MHz,  $\text{CDCl}_3$ ):  $\delta$  = 191.2, 188.9, 167.0, 158.8, 138.1, 135.7, 134.6, 134.0, 129.1, 128.9, 128.8, 128.4, 125.2, 118.6, 44.8, 39.4, 38.3, 22.0, 9.9 ppm. ESI HRMS: calcd. for  $\text{C}_{27}\text{H}_{22}\text{N}_2\text{O}_3+\text{Na}$  445.1528, found 445.1525.

(7-oxo-4,6-diphenyl-5,6-diazaspiro[2.4]hept-4-ene-1,2-diyl)bis(phenylmethanone) (**3na**). Yellow oil, 12 h, 13.4 mg, 57% yield; <sup>1</sup>H NMR (600 MHz, CDCl<sub>3</sub>): δ = 8.02 (d, *J* = 7.2 Hz, 2H), 7.92 (d, *J* = 7.8 Hz, 2H), 7.73 (d, *J* = 7.2 Hz, 2H), 7.58 (q, *J* = 7.8 Hz, 2H), 7.48 (t, *J* = 7.8 Hz, 2H), 7.44 (t, *J* = 7.2 Hz, 1H), 7.42-7.33 (m, 6H), 7.27 (d, *J* = 7.2 Hz, 2H), 7.20 (t, *J* = 7.8 Hz, 1H), 4.55 (d, *J* = 8.4 Hz, 1H), 4.23 (d, *J* = 8.4 Hz, 1H) ppm. <sup>13</sup>C NMR (100 MHz, CDCl<sub>3</sub>): δ = 191.0, 188.6, 166.8, 160.1, 160.0, 155.0, 137.9, 137.0, 136.9, 130.2, 129.9, 128.8, 125.3, 121.6, 121.4, 121.1, 120.9, 118.6, 112.4, 112.1, 55.5, 55.4, 44.9, 39.4, 38.4, 15.1 ppm. ESI HRMS: calcd. for C<sub>31</sub>H<sub>22</sub>N<sub>2</sub>O<sub>3</sub>+H 471.1709, found 471.1709.

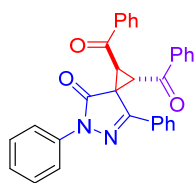

**3na**

(4-methyl-7-oxo-6-phenyl-5,6-diazaspiro[2.4]hept-4-ene-1,2-diyl)bis(p-tolylmethanone) (**3ab**). Yellow oil, 12 h, 16.4 mg, 75% yield; <sup>1</sup>H NMR (400 MHz, CDCl<sub>3</sub>): δ = 7.92 (d, *J* = 8.4 Hz, 2H), 7.80 (d, *J* = 7.6 Hz, 2H), 7.76 (d, *J* = 8.0 Hz, 2H), 7.33 (t, *J* = 7.6 Hz, 2H), 7.28 (d, *J* = 8.0 Hz, 2H), 7.23 (d, *J* = 8.0 Hz, 2H), 7.14 (t, *J* = 7.6 Hz, 1H), 4.32 (d, *J* = 8.0 Hz, 1H), 4.22 (d, *J* = 8.0 Hz, 1H), 2.42 (s, 3H), 2.37 (s, 3H), 2.06 (s, 3H) ppm. <sup>13</sup>C NMR (100 MHz, CDCl<sub>3</sub>): δ = 190.6, 188.4, 166.9, 155.2, 145.8, 145.0, 138.0, 133.3, 129.8, 129.6, 128.9, 128.8, 128.5, 125.1, 118.6, 44.9, 39.3, 38.4, 21.8, 21.7, 15.1 ppm. ESI HRMS: calcd. for C<sub>28</sub>H<sub>24</sub>N<sub>2</sub>O<sub>3</sub>+H 437.1865, found 437.1859.

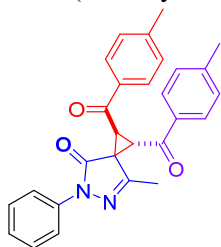

**3ab**

(4-methyl-7-oxo-6-phenyl-5,6-diazaspiro[2.4]hept-4-ene-1,2-diyl)bis(p-tolylmethanone) (**3ac**). Yellow oil, 12 h, 19.3 mg, 81% yield; <sup>1</sup>H NMR (400 MHz, CDCl<sub>3</sub>): δ = 8.02 (t, *J* = 1.6 Hz, 1H), 7.89-7.87 (m, 2H), 7.80-7.77 (m, 2H), 7.66-7.61 (m, 2H), 7.55-7.52 (m, 1H), 7.45 (t, *J* = 8.0 Hz, 1H), 7.40-7.35 (m, 3H), 7.16 (t, *J* = 7.6 Hz, 1H), 4.27 (d, *J* = 8.0 Hz, 1H), 4.19 (d, *J* = 8.0 Hz, 1H), 2.09 (s, 3H) ppm. <sup>13</sup>C NMR (100 MHz, CDCl<sub>3</sub>): δ = 189.8, 187.5, 166.5, 154.6, 141.4, 140.7, 137.7, 133.9, 133.8, 130.1, 129.6, 129.5, 129.3, 128.8, 125.4, 118.5, 44.8, 38.8, 38.0, 15.1 ppm. ESI HRMS: calcd. for C<sub>26</sub>H<sub>18</sub>Cl<sub>2</sub>N<sub>2</sub>O<sub>3</sub>+Na 499.0592, found 499.0595.

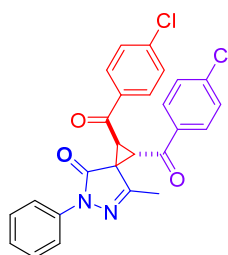

**3ac**

(4-methyl-7-oxo-6-phenyl-5,6-diazaspiro[2.4]hept-4-ene-1,2-diyl)bis((4-bromophenyl)methanone) (**3ad**). Yellow oil, 12 h, 12.1 mg, 43% yield; <sup>1</sup>H NMR (400 MHz, CDCl<sub>3</sub>): δ = 7.88 (d, *J* = 8.4 Hz, 2H), 7.79 (d, *J* = 8.4 Hz, 2H), 7.71 (d, *J* = 8.0 Hz, 2H), 7.65 (d, *J* = 8.4 Hz, 2H), 7.59 (d, *J* = 8.4 Hz, 2H), 7.35 (t, *J* = 8.0 Hz, 2H), 7.17 (t, *J* = 7.6 Hz, 1H), 4.26 (d, *J* = 8.0 Hz, 1H), 4.19 (d, *J* = 8.0 Hz, 1H), 2.07 (s, 3H) ppm. <sup>13</sup>C NMR (100 MHz, CDCl<sub>3</sub>): δ = 190.1, 187.8, 166.5, 154.7, 134.3, 134.3, 132.5, 132.4, 130.3, 130.2, 129.8, 129.7, 129.5, 128.9, 125.4, 118.6, 44.9, 38.9, 125.4, 118.6, 44.9, 38.9, 38.0, 15.1 ppm. ESI HRMS: calcd. for C<sub>26</sub>H<sub>18</sub>Br<sub>2</sub>N<sub>2</sub>O<sub>3</sub>+Na 586.9582, found 586.9574.

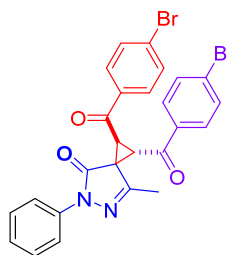

**3ad**



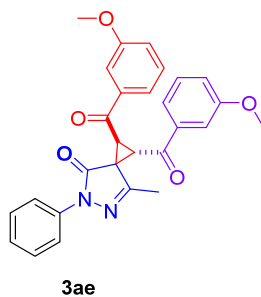

(4-methyl-7-oxo-6-phenyl-5,6-diazaspiro[2.4]hept-4-ene-1,2-diyl)bis(p-tolylmethanone) (**3ae**). Yellow oil, 12 h, 16.6 mg, 71% yield;  $^1\text{H}$  NMR (400 MHz,  $\text{CDCl}_3$ ):  $\delta$  = 7.72 (d,  $J$  = 7.6 Hz, 2H), 7.52 (d,  $J$  = 7.6 Hz, 1H), 7.47-7.46 (m, 1H), 7.38-7.37 (m, 1H), 7.34-7.23 (m, 5H), 7.12-7.03 (m, 3H), 4.24 (d,  $J$  = 8.0 Hz, 1H), 4.13 (d,  $J$  = 8.0 Hz, 1H), 3.77 (s, 3H), 3.74 (s, 3H), 2.01 (s, 3H) ppm.  $^{13}\text{C}$  NMR (100 MHz,  $\text{CDCl}_3$ ):  $\delta$  = 191.0, 188.6, 166.8, 160.1, 160.0, 155.0, 137.9, 137.0, 136.9, 130.2, 129.9, 128.8, 125.3, 121.6, 121.4, 121.1, 120.9, 118.6, 112.4, 112.1, 55.5, 55.4, 44.9, 39.4, 38.4, 15.1 ppm. ESI HRMS: calcd. for  $\text{C}_{28}\text{H}_{24}\text{N}_2\text{O}_5+\text{Na}$  491.1583, found 491.1592.

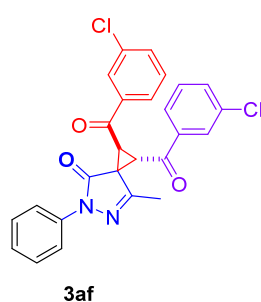

(4-methyl-7-oxo-6-phenyl-5,6-diazaspiro[2.4]hept-4-ene-1,2-diyl)bis((3-chlorophenyl)methanone) (**3af**). Yellow oil, 12 h, 18.1 mg, 76% yield;  $^1\text{H}$  NMR (400 MHz,  $\text{CDCl}_3$ ):  $\delta$  = 8.02 (t,  $J$  = 1.6 Hz, 1H), 7.89-7.87 (m, 2H), 7.80-7.77 (m, 2H), 7.66-7.63 (m, 2H), 7.55-7.52 (m, 1H), 7.45 (t,  $J$  = 8.0 Hz, 1H), 7.40-7.33 (m, 3H), 7.16 (t,  $J$  = 7.6 Hz, 1H), 4.27 (d,  $J$  = 8.0 Hz, 1H), 4.19 (d,  $J$  = 8.0 Hz, 1H), 2.09 (s, 3H) ppm.  $^{13}\text{C}$  NMR (100 MHz,  $\text{CDCl}_3$ ):  $\delta$  = 189.9, 187.5, 166.4, 163.9, 154.6, 137.7, 137.1, 137.0, 135.7, 135.5, 134.6, 134.1, 130.5, 130.3, 128.9, 128.5, 128.5, 127.0, 126.3, 125.5, 118.7, 45.0, 38.8, 38.0, 15.2 ppm. ESI HRMS: calcd. for  $\text{C}_{26}\text{H}_{18}\text{Cl}_2\text{N}_2\text{O}_3+\text{H}$  477.0773, found 477.0774.

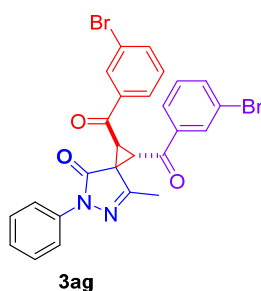

(4-methyl-7-oxo-6-phenyl-5,6-diazaspiro[2.4]hept-4-ene-1,2-diyl)bis((3-bromophenyl)methanone) (**3ag**). Yellow oil, 12 h, 14.1 mg, 50% yield;  $^1\text{H}$  NMR (400 MHz,  $\text{CDCl}_3$ ):  $\delta$  = 8.19 (s, 1H), 8.05 (s, 1H), 7.93 (d,  $J$  = 7.6 Hz, 1H), 7.79 (d,  $J$  = 7.6 Hz, 3H), 7.69 (d,  $J$  = 8.0 Hz, 2H), 7.41-7.26 (m, 4H), 7.17 (t,  $J$  = 7.6 Hz, 1H), 4.27 (d,  $J$  = 8.4 Hz, 1H), 4.20 (d,  $J$  = 8.4 Hz, 1H), 2.10 (s, 3H) ppm.  $^{13}\text{C}$  NMR (100 MHz,  $\text{CDCl}_3$ ):  $\delta$  = 189.9, 187.4, 166.4, 154.6, 137.7, 137.5, 137.3, 137.2, 137.0, 131.5, 131.5, 130.7, 130.5, 128.9, 127.5, 126.7, 125.5, 123.6, 123.5, 118.7, 45.0, 38.7, 38.0, 15.2 ppm. ESI HRMS: calcd. for  $\text{C}_{26}\text{H}_{18}\text{Br}_2\text{N}_2\text{O}_3+\text{Na}$  586.9582, found 586.9576.

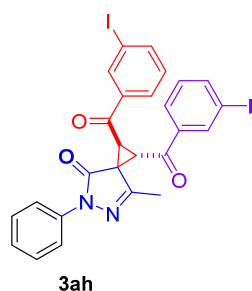

(4-methyl-7-oxo-6-phenyl-5,6-diazaspiro[2.4]hept-4-ene-1,2-diyl)bis((3-iodophenyl)methanone) (**3ah**). Yellow oil, 12 h, 17.4 mg, 53% yield;  $^1\text{H}$  NMR (400 MHz,  $\text{CDCl}_3$ ):  $\delta$  = 8.38 (s, 1H), 8.24 (s, 1H), 7.96 (t,  $J$  = 7.2 Hz, 2H), 7.89 (d,  $J$  = 7.6 Hz, 1H), 7.79 (d,  $J$  = 8.0 Hz, 2H), 7.72 (d,  $J$  = 7.6 Hz, 1H), 7.36 (t,  $J$  = 8.0 Hz, 2H), 7.27-7.23 (m, 1H), 7.17 (t,  $J$  = 7.6 Hz, 2H), 4.26 (d,  $J$  = 8.0 Hz, 1H), 4.18 (d,  $J$  = 8.0 Hz, 1H), 2.10 (s, 3H) ppm.  $^{13}\text{C}$  NMR (100 MHz,  $\text{CDCl}_3$ ):  $\delta$  = 189.8, 187.4, 166.5, 154.6, 143.4, 142.8, 137.7, 137.5, 137.4, 137.2, 137.1, 130.7, 130.5, 128.9, 128.1, 127.3, 125.5, 118.7, 94.9, 94.9, 45.0, 38.6, 37.9, 15.2 ppm. ESI HRMS: calcd. for  $\text{C}_{26}\text{H}_{18}\text{I}_2\text{N}_2\text{O}_3+\text{H}$  660.9485, found 660.9483.

(4-methyl-7-oxo-6-phenyl-5,6-diazaspiro[2.4]hept-4-ene-1,2-diyl)bis((2-chlorophenyl)methanone) (**3aj**). Yellow oil, 12 h, 9.3 mg, 39% yield; <sup>1</sup>H NMR (400 MHz, CDCl<sub>3</sub>): δ = 7.80 (d, *J* = 8.0 Hz, 2H), 7.70 (d, *J* = 7.2 Hz, 1H), 7.61 (d, *J* = 7.2 Hz, 1H), 7.44-7.42 (m, 1H), 7.41-7.31 (m, 7H), 7.15 (t, *J* = 7.2 Hz, 1H), 4.40 (d, *J* = 8.0 Hz, 1H), 4.05 (d, *J* = 8.0 Hz, 1H), 2.12 (s, 3H) ppm. <sup>13</sup>C NMR (100 MHz, CDCl<sub>3</sub>): δ = 193.1, 191.1, 167.1, 155.5, 137.9, 137.2, 137.0, 133.5, 133.2, 132.5, 131.9, 131.7, 131.0, 130.5, 130.4, 128.8, 127.3, 127.3, 125.3, 118.8, 48.0, 43.5, 41.9, 15.4 ppm. ESI HRMS: calcd. for C<sub>26</sub>H<sub>18</sub>Cl<sub>2</sub>N<sub>2</sub>O<sub>3</sub>+H 477.0773, found 477.0772.

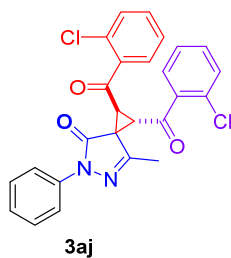

(4-methyl-7-oxo-6-phenyl-5,6-diazaspiro[2.4]hept-4-ene-1,2-diyl)bis(thiophen-3-ylmethanone) (**3ak**). Yellow oil, 12 h, 13.9 mg, 66% yield; <sup>1</sup>H NMR (400 MHz, CDCl<sub>3</sub>): δ = 7.82 (dd, *J*<sub>1</sub> = 4.0 Hz, *J*<sub>2</sub> = 1.2 Hz, 1H), 7.76-7.73 (m, 2H), 7.71 (dd, *J*<sub>1</sub> = 4.8 Hz, *J*<sub>2</sub> = 1.2 Hz, 1H), 7.59 (dd, *J*<sub>1</sub> = 5.2 Hz, *J*<sub>2</sub> = 1.2 Hz, 1H), 7.54 (dd, *J*<sub>1</sub> = 4.0 Hz, *J*<sub>2</sub> = 1.2 Hz, 1H), 7.28 (t, *J* = 7.2 Hz, 2H), 7.12-7.06 (m, 2H), 7.04-7.02 (m, 1H), 4.19 (d, *J* = 8.0 Hz, 1H), 4.13 (d, *J* = 8.0 Hz, 1H), 2.07 (s, 3H) ppm. <sup>13</sup>C NMR (100 MHz, CDCl<sub>3</sub>): δ = 183.3, 181.1, 166.7, 155.1, 143.0, 142.4, 137.9, 136.1, 134.8, 13.4, 132.8, 128.9, 128.8, 128.5, 125.2, 118.6, 45.0, 39.7, 38.8, 15.2 ppm. ESI HRMS: calcd. for C<sub>22</sub>H<sub>16</sub>N<sub>2</sub>O<sub>3</sub>S<sub>2</sub>+Na 443.0500, found 443.0504

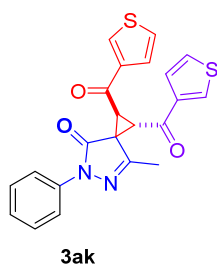

1,2-bis(hydroxy(phenyl)methyl)-7-methyl-5-phenyl-5,6-diazaspiro[2.4]hept-6-en-4-one (**4**). White soild, 5 min, 17.1 mg, 83% yield; <sup>1</sup>H NMR (400 MHz, CDCl<sub>3</sub>): δ = 7.90 (d, *J* = 7.6 Hz, 2H), 7.40 (t, *J* = 8.0 Hz, 2H), 7.25-7.24 (m, 1H), 7.23-7.19 (m, 3H), 7.17-7.15 (m, 2H), 7.13-7.08 (m, 1H), 5.21 (dd, *J*<sub>1</sub> = 8.4 Hz, *J*<sub>2</sub> = 4.8 Hz, 1H), 4.56 (d, *J*<sub>1</sub> = 9.6 Hz, *J*<sub>2</sub> = 3.2 Hz, 1H), 2.82-2.76 (m, 1H), 2.65-2.61 (m, 1H), 2.26 (s, 3H) ppm. <sup>13</sup>C NMR (100 MHz, CDCl<sub>3</sub>): δ = 171.4, 157.8, 142.2, 141.5, 138.4, 128.8, 128.5, 128.2, 127.6, 125.4, 125.4, 125.1, 119.1, 73.6, 69.2, 46.7, 45.4, 41.8, 15.8 ppm. ESI HRMS: calcd. for C<sub>26</sub>H<sub>24</sub>N<sub>2</sub>O<sub>3</sub>+Na 435.1685, found 435.1684.

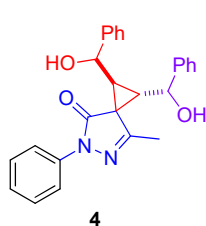

## References

1. a) Lai, X.; Zha, G.; Liu, W.; Xu, Y.; Sun, P.; Xia, T.; Shen, Y. *Synlett.*, **2016**, 27(13), 1983; b) Hadi, V.; Koh, Y. H.; Sanchez, T. W.; Barrios, D.; Neamati, N.; Jung, K. W. *Bioorg. Med. Chem. Lett.* **2010**, 20, 6854.
2. a) Xu, Y.; Zheng, G.; Yang, X.; Li, X. *Chem. Commun.*, **2018**, 54, 670; b) Wu, X.; Xiong, H.; Sun, S.; Cheng, J. *Org. Lett.* **2018**, 20, 1396.
3. Vetica, F.; Chauhan, P.; Mahajan, S.; Raabe, G.; Enders, D. *Synthesis*, **2018**, 50, 1039.
4. a) Jia, Y.; Tang, X.; Cai, G.; Jia, R.; Wang, B.; Miao, Z. *Eur. J. Org. Chem.* **2015**, 4720; b) Liang, J.; Chen, Q.; Liu, L.; Jiang, X.; Wang, R. *Org. Biomol. Chem.*, **2013**, 11, 1441.

## 8. NMR Spectra of Pyrazolin-5-one Derivatives

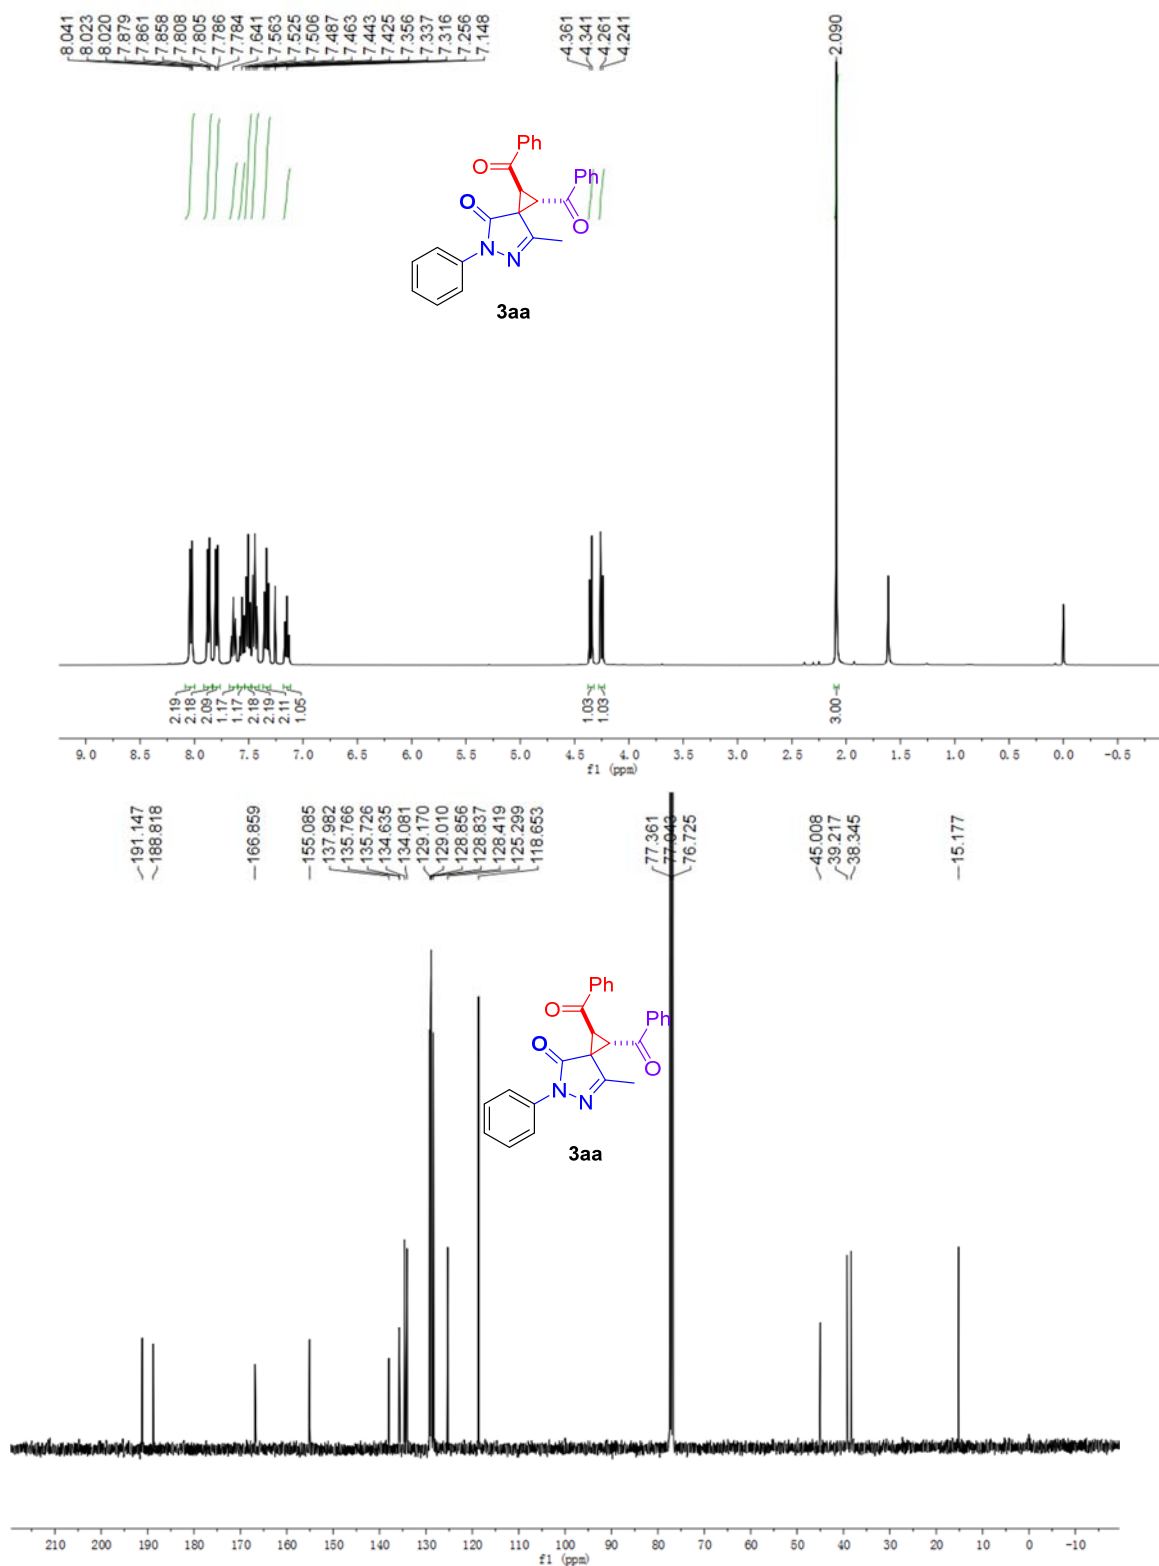

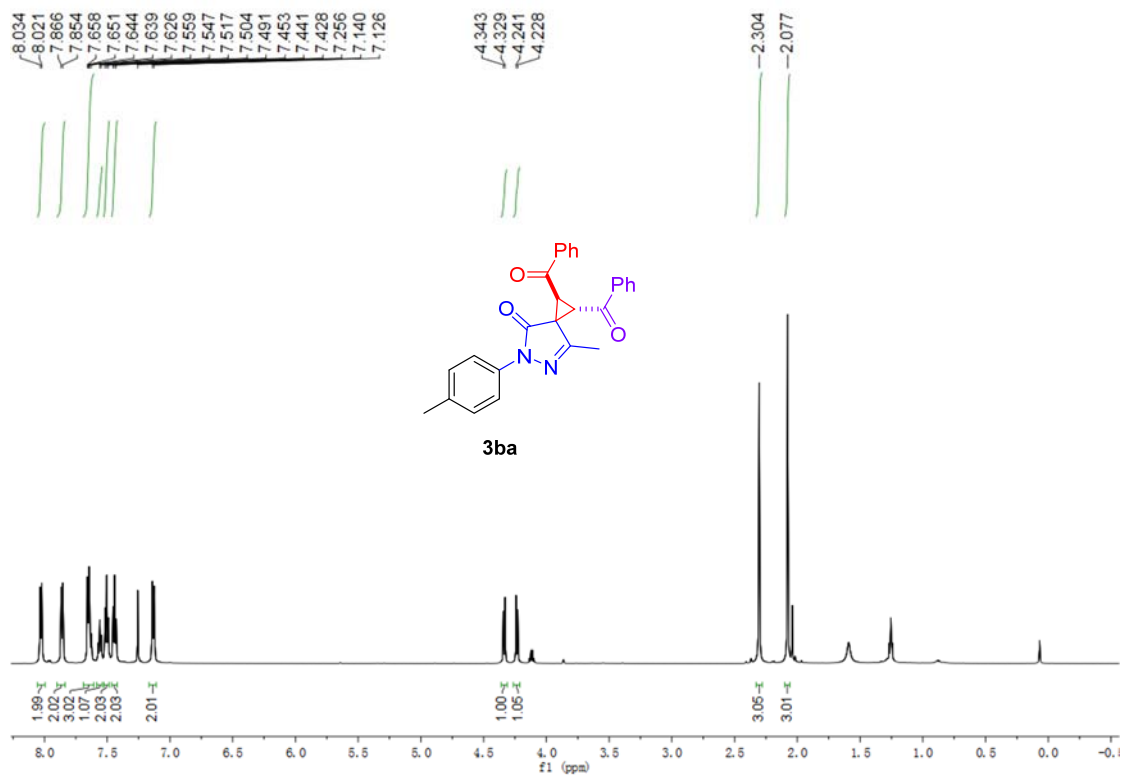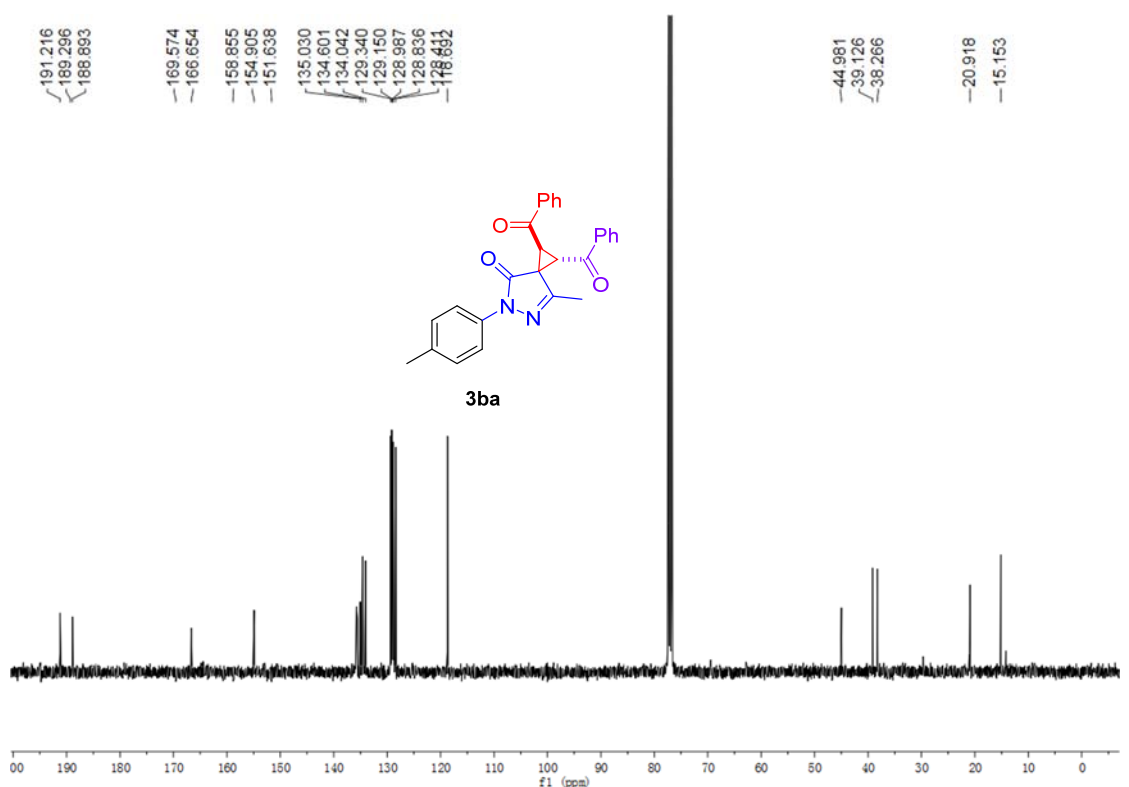

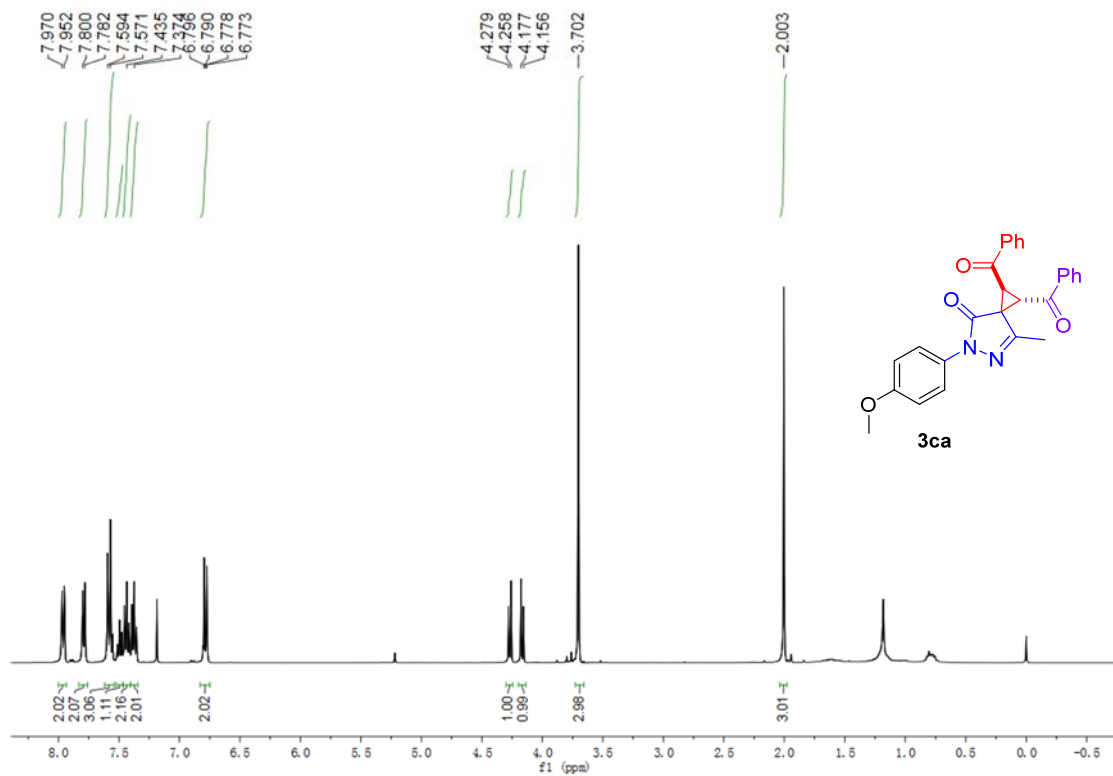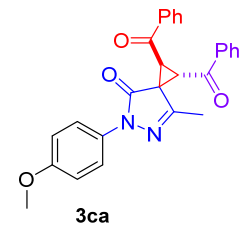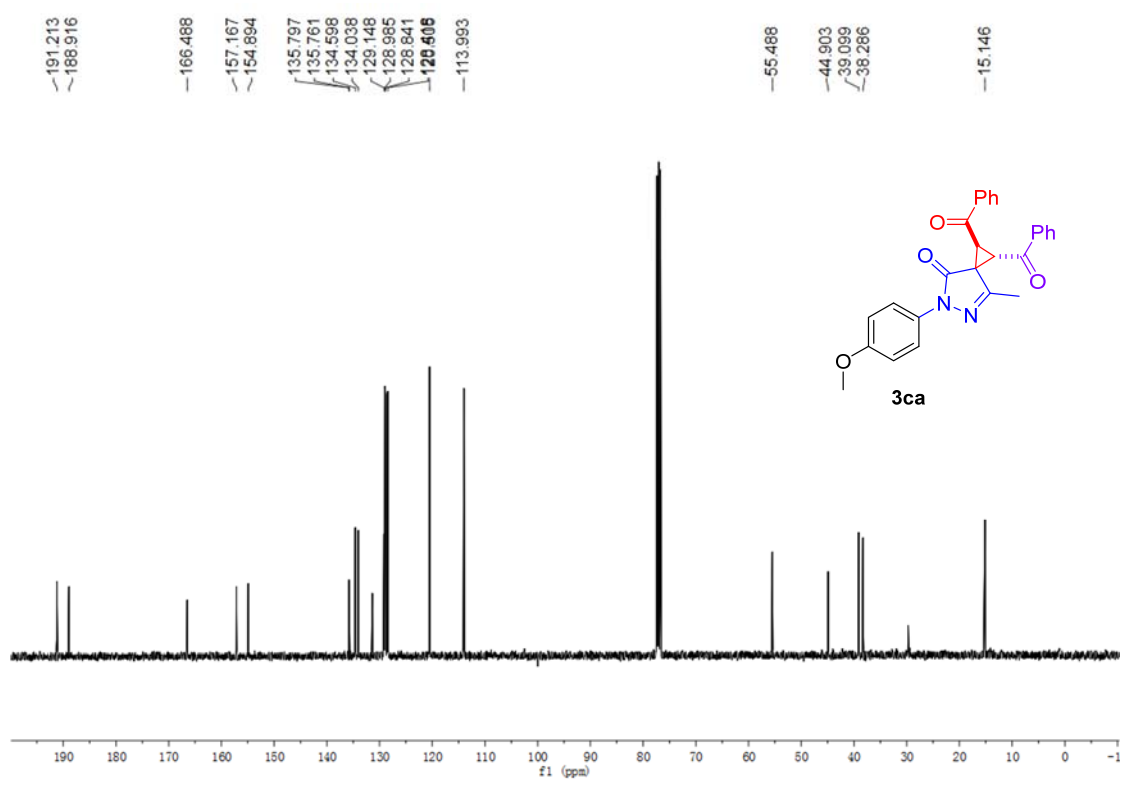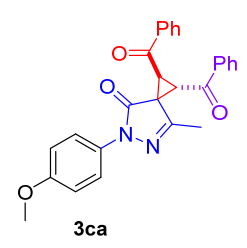

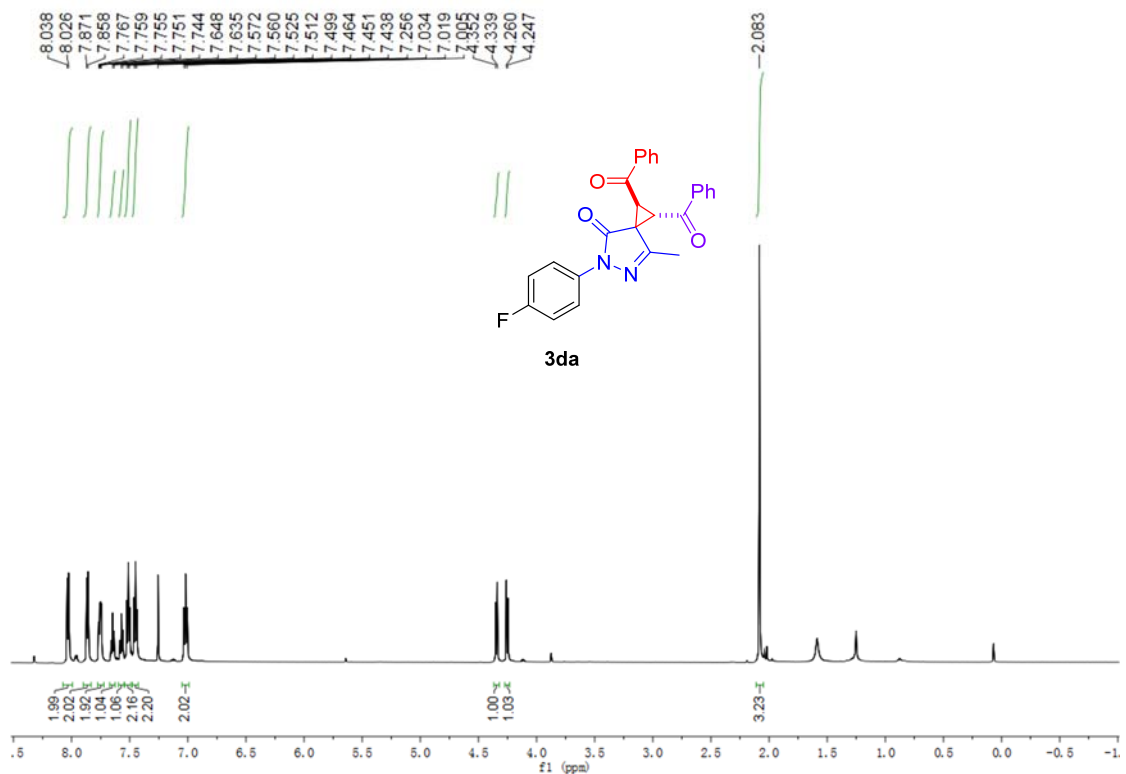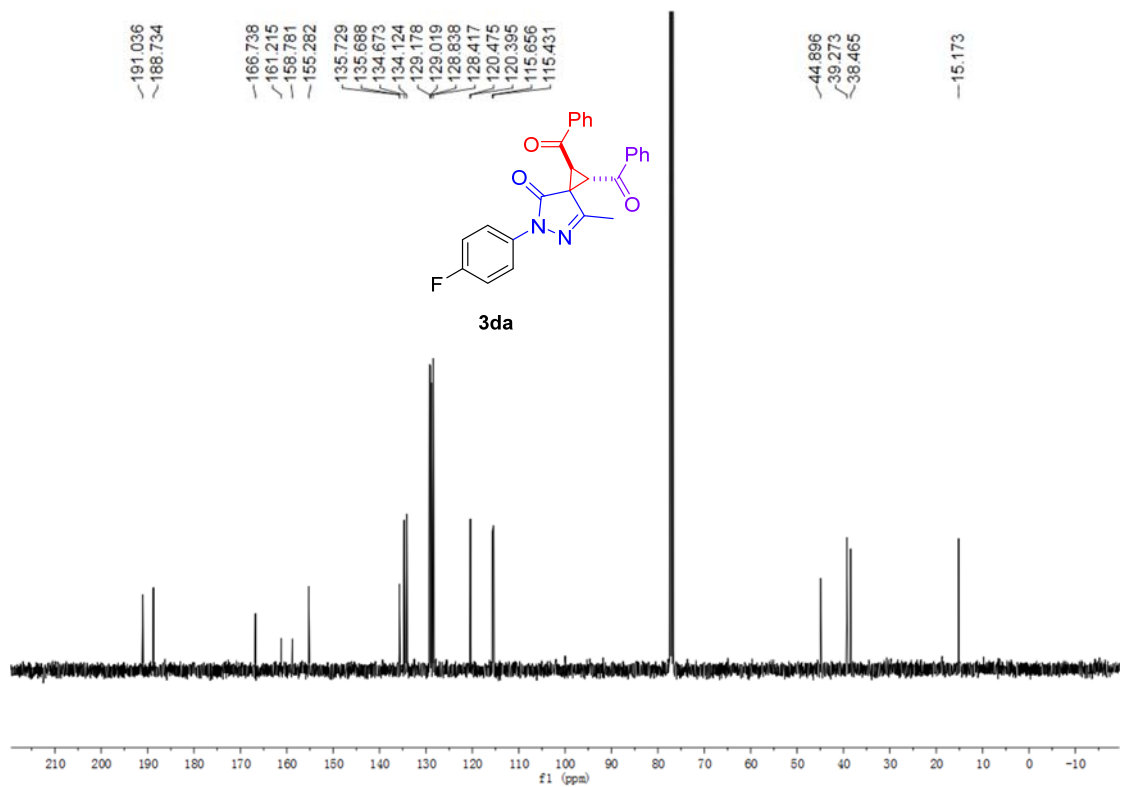

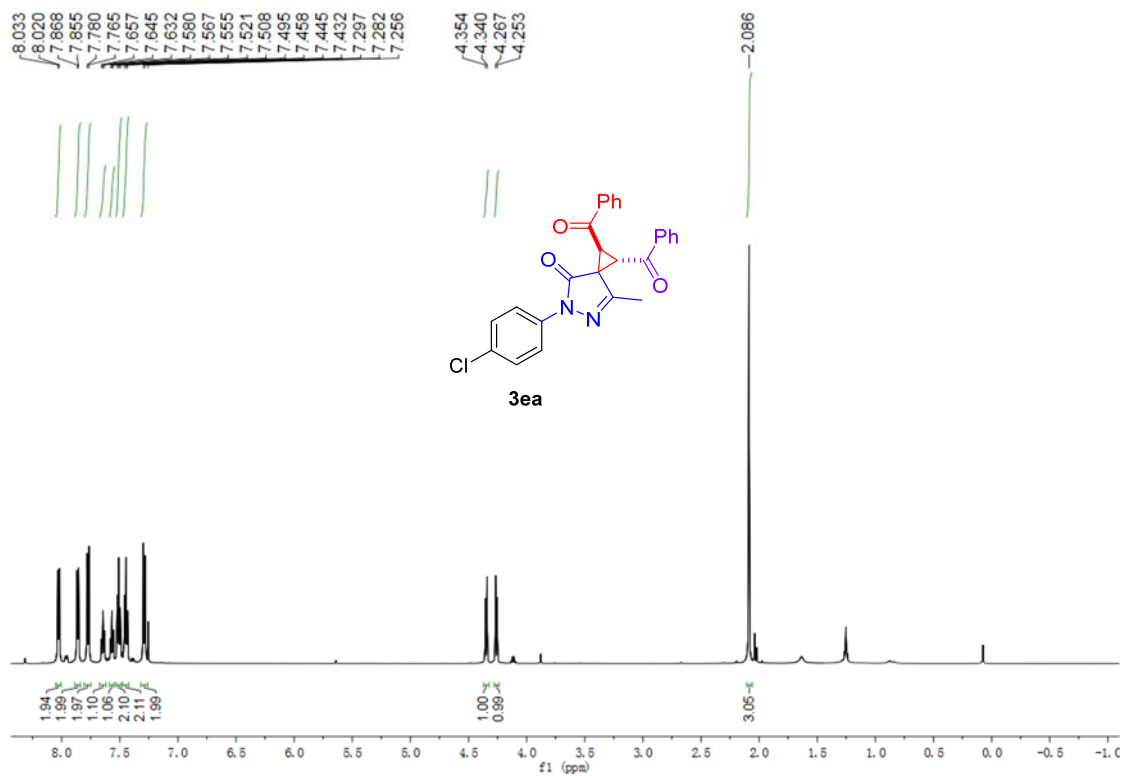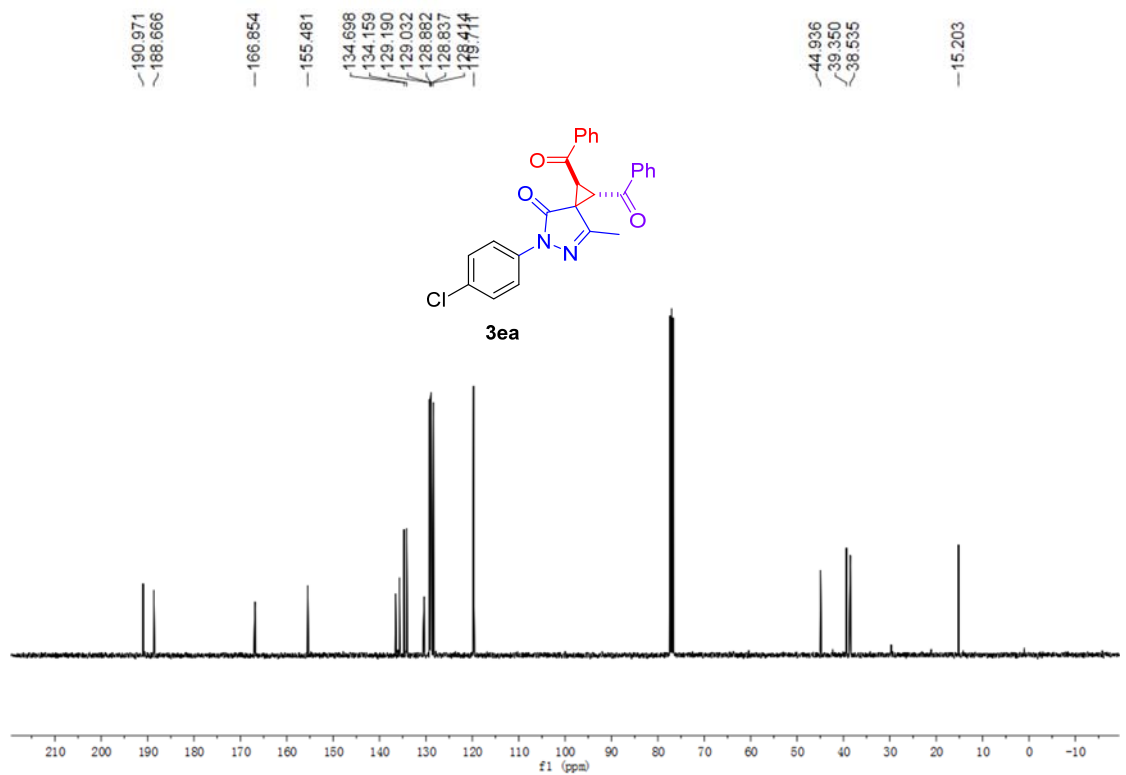

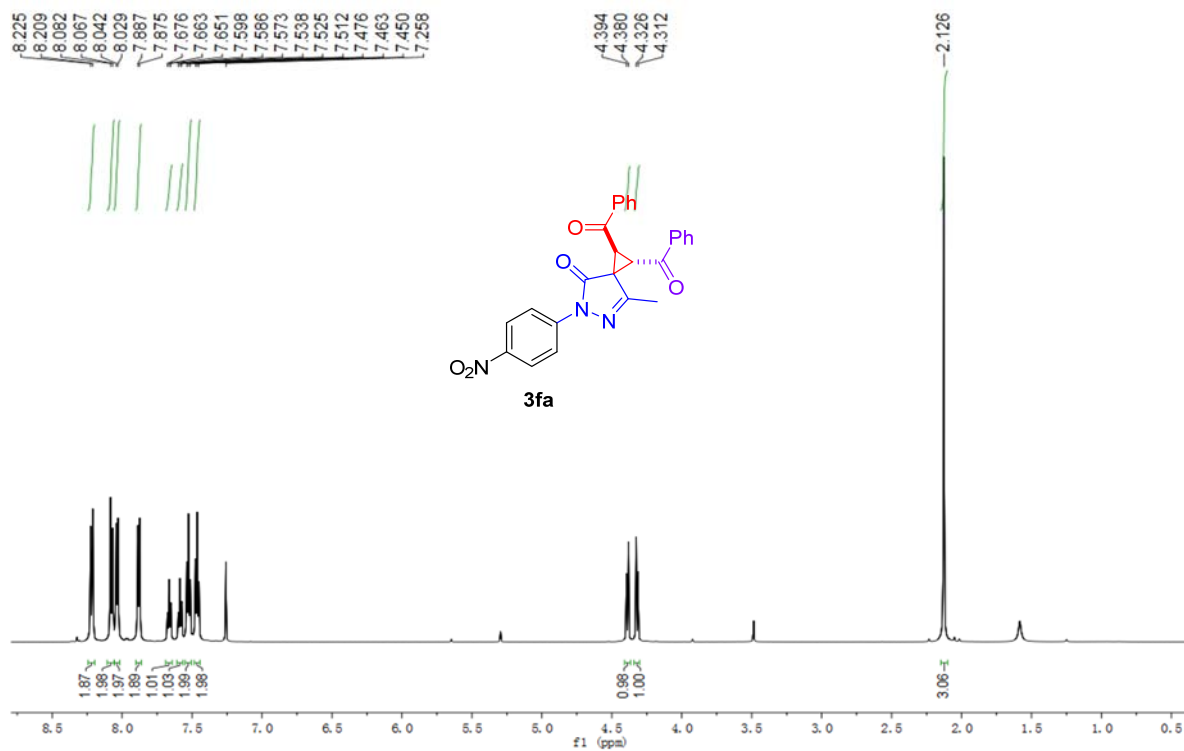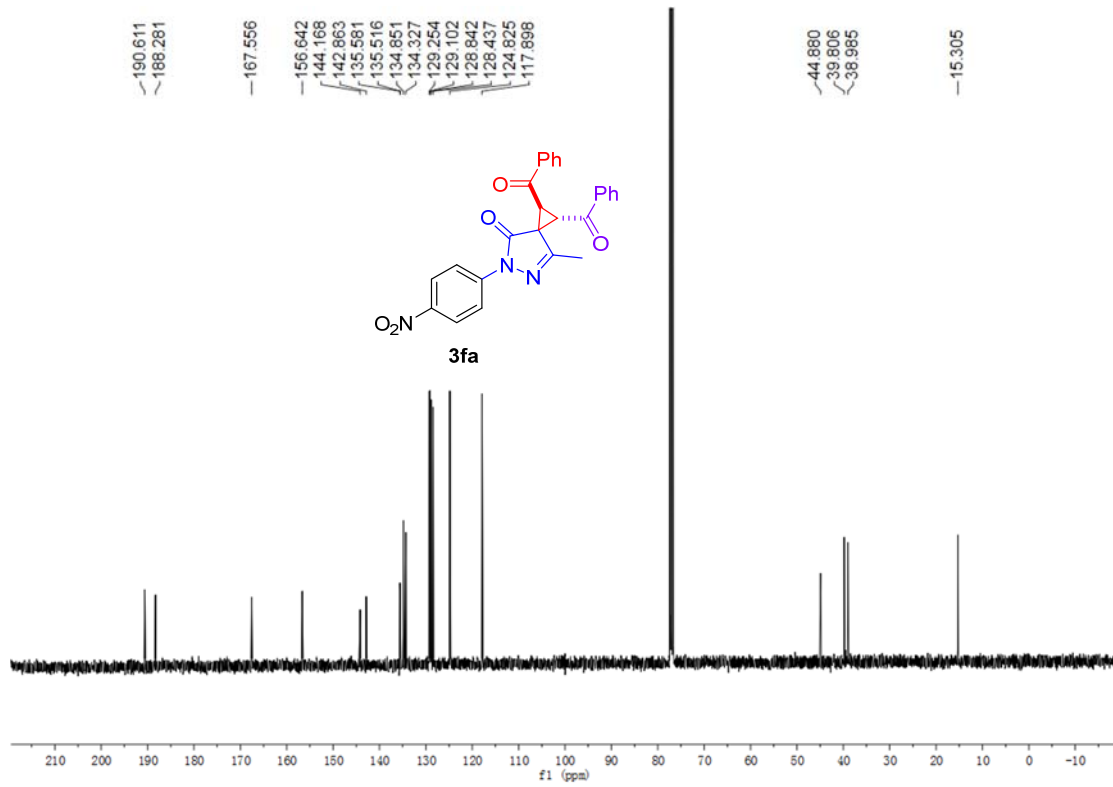



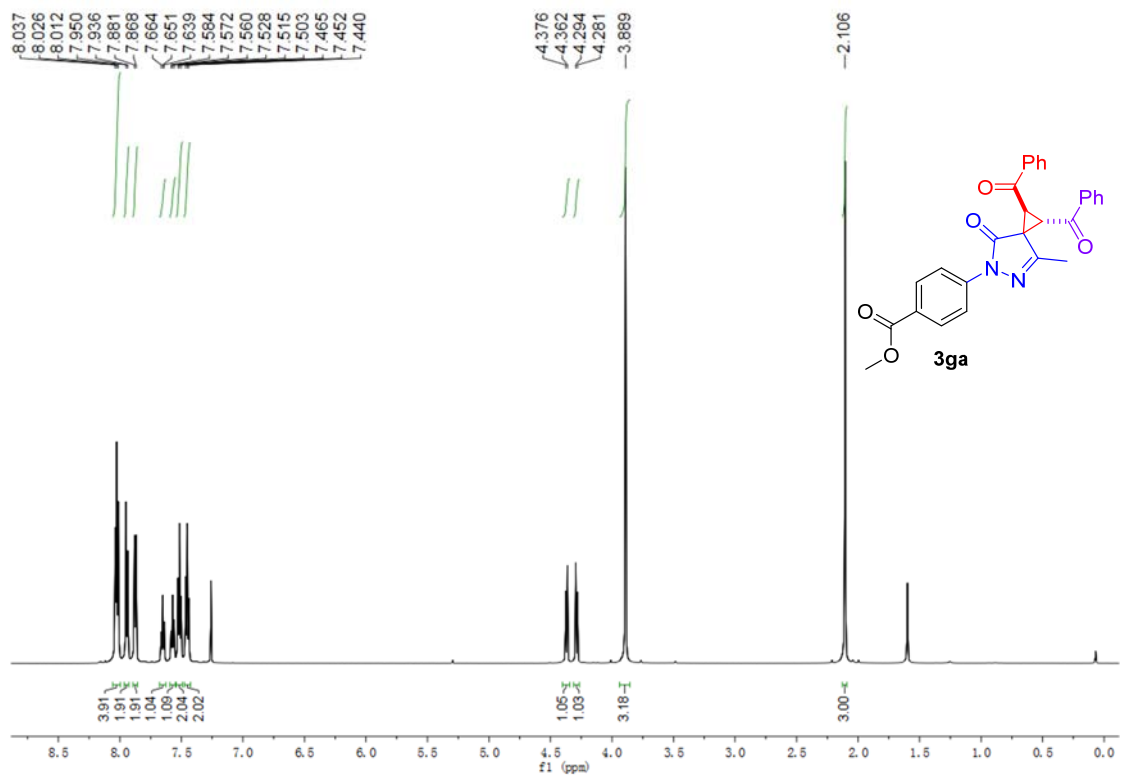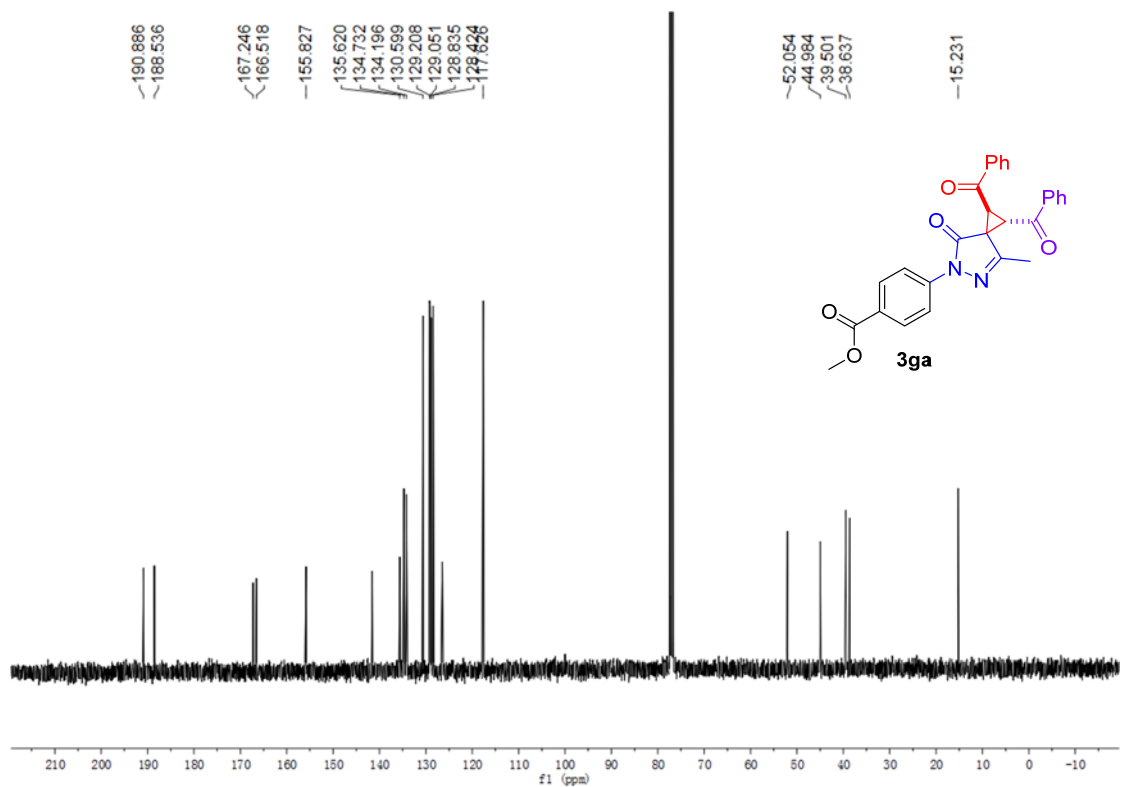

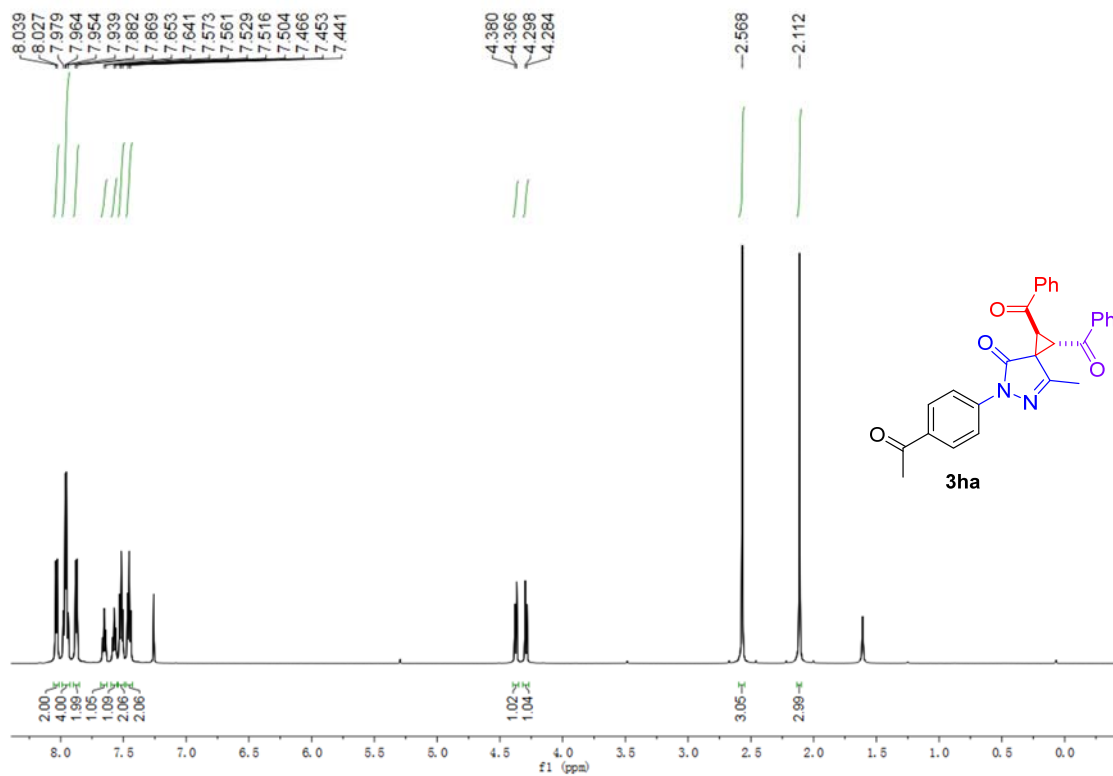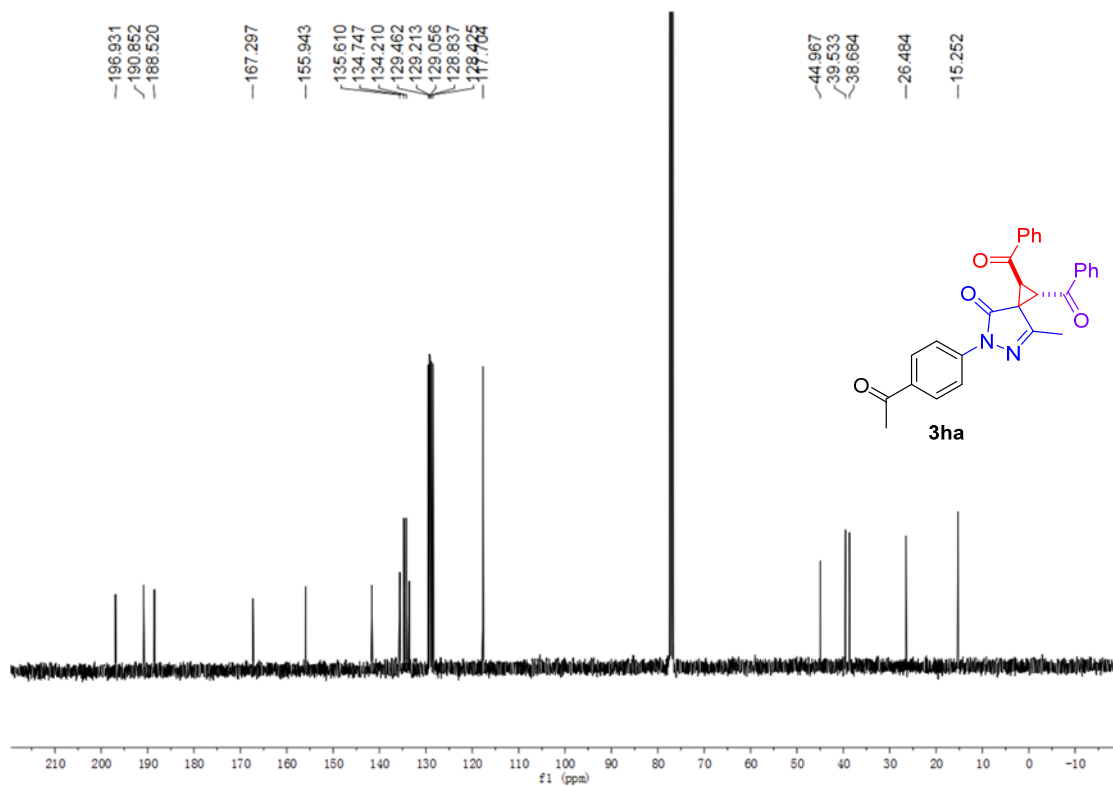

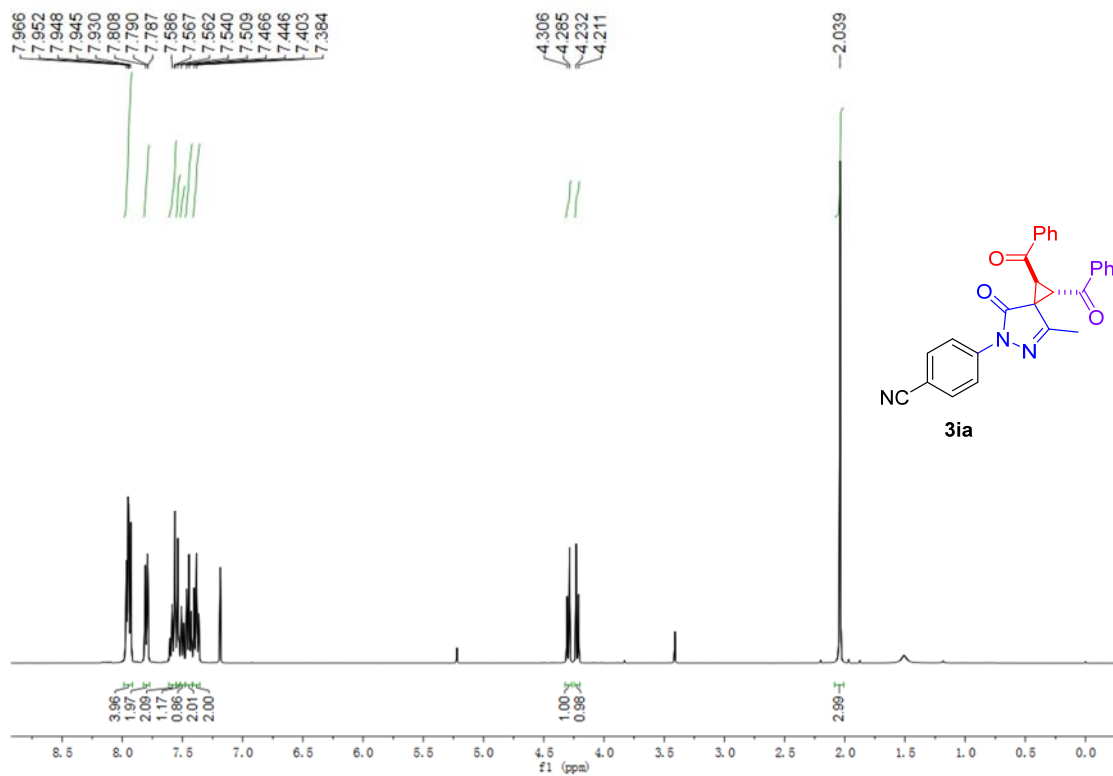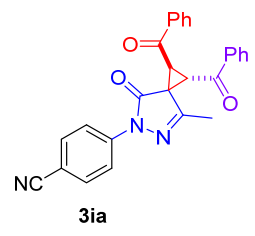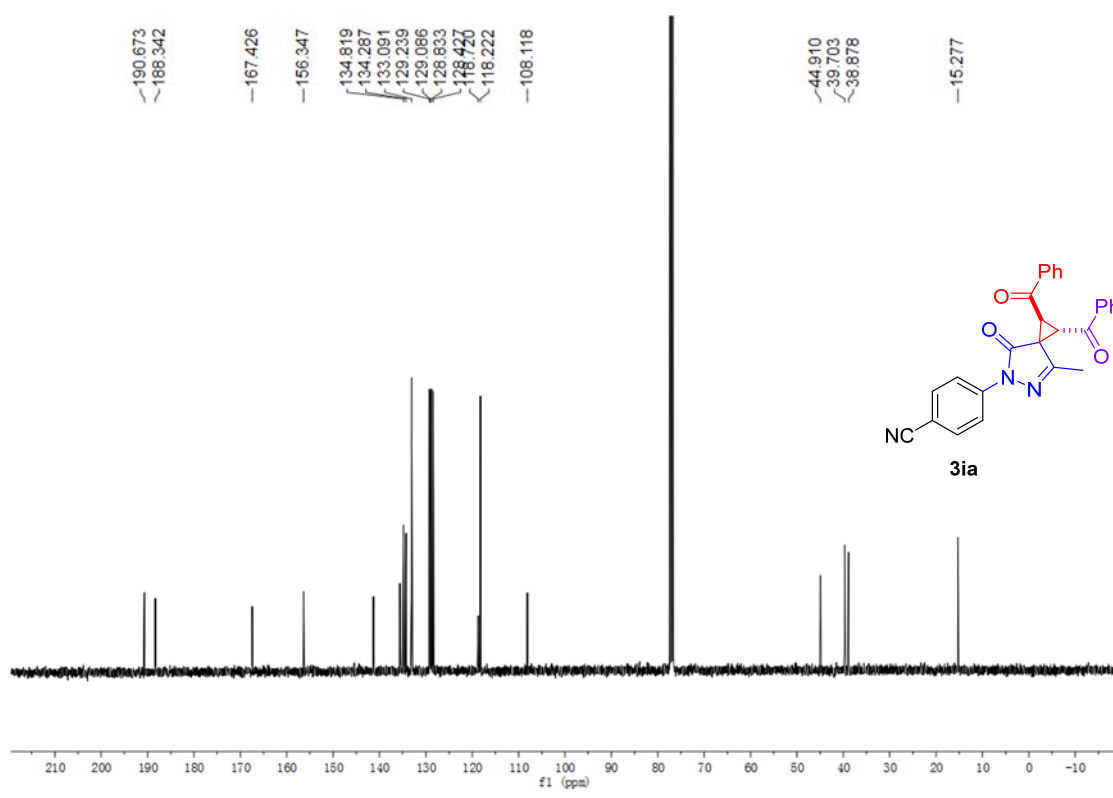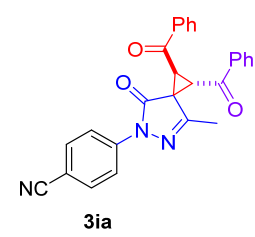

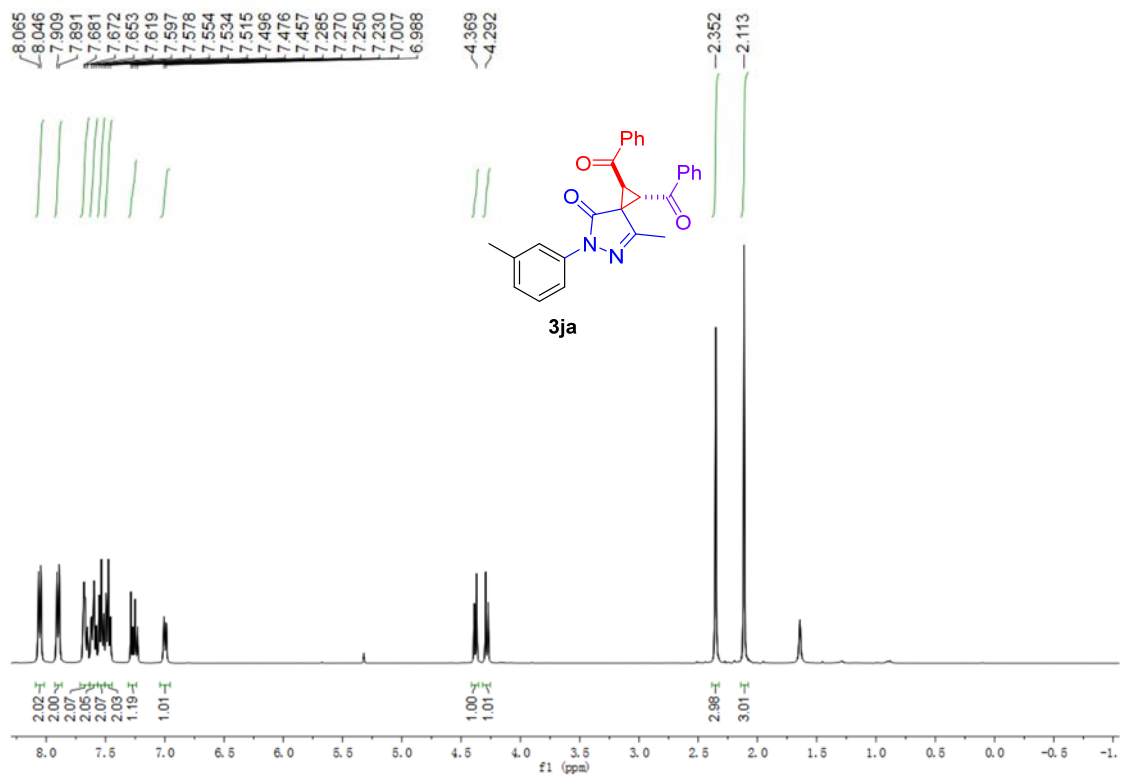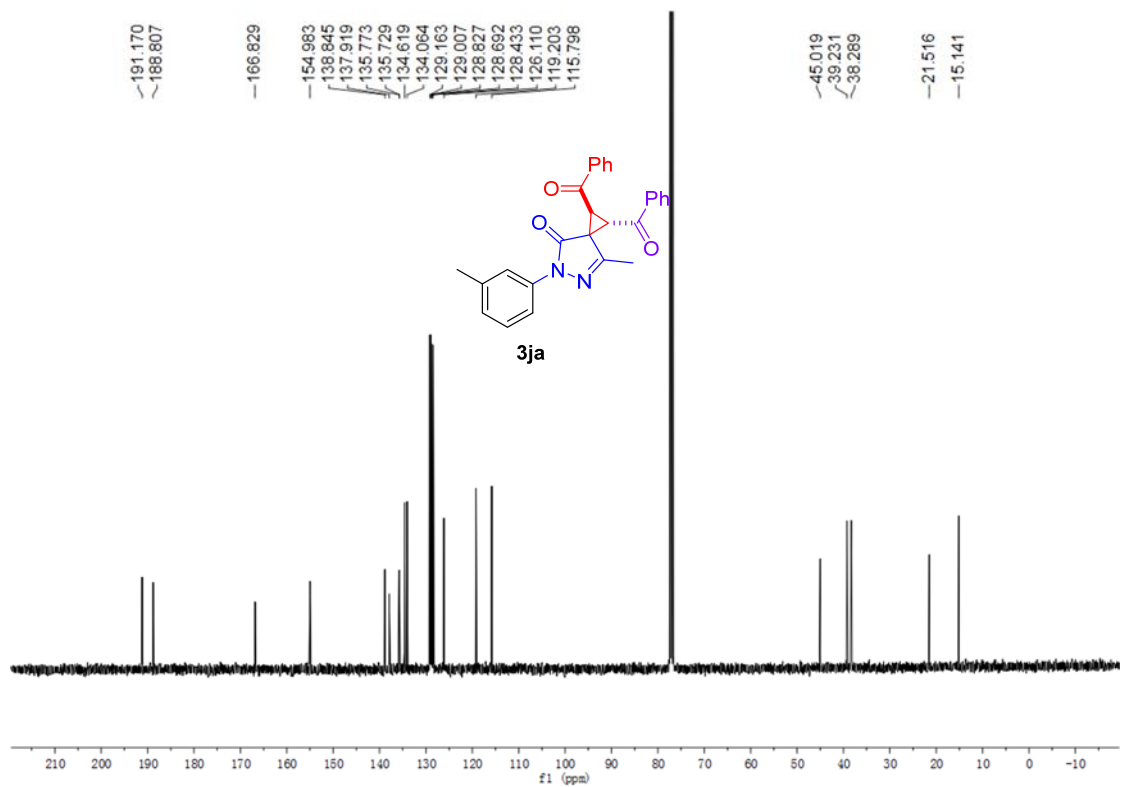

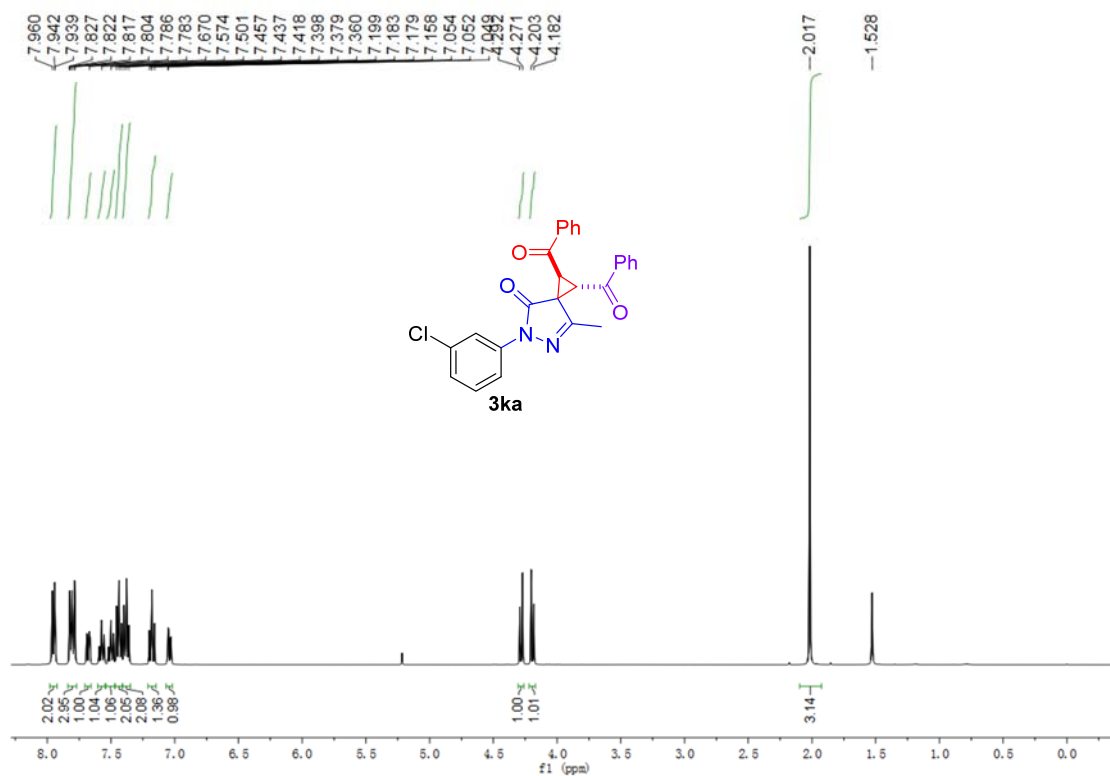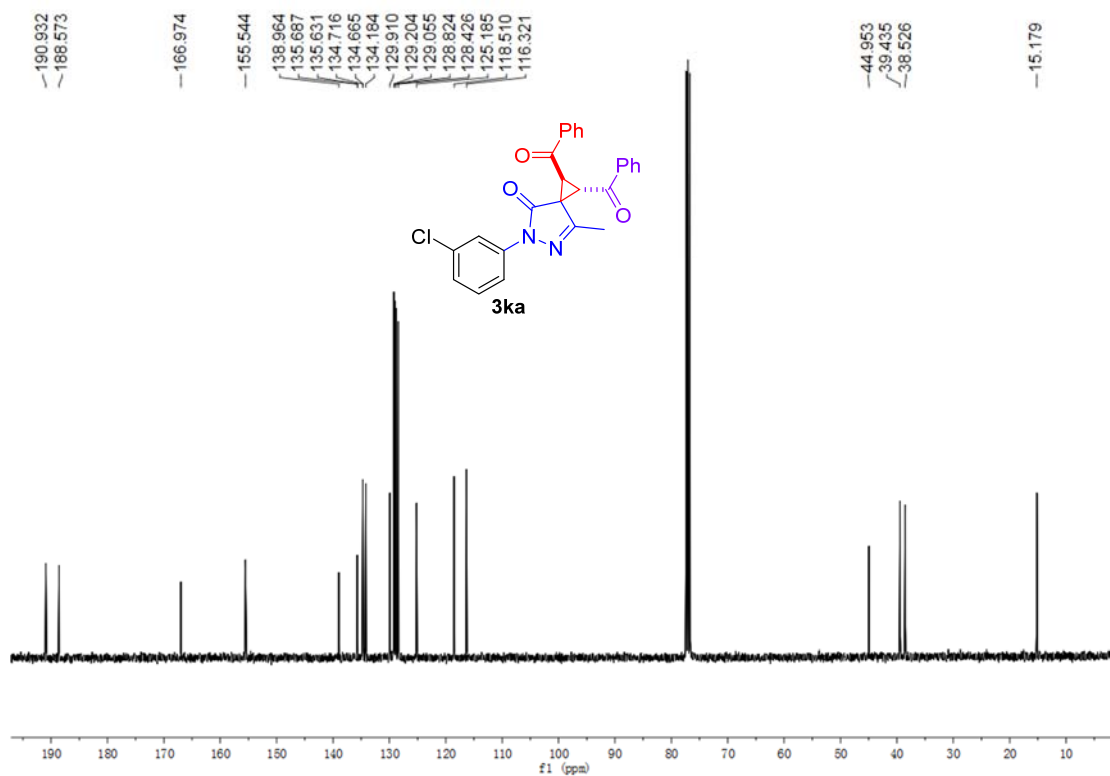

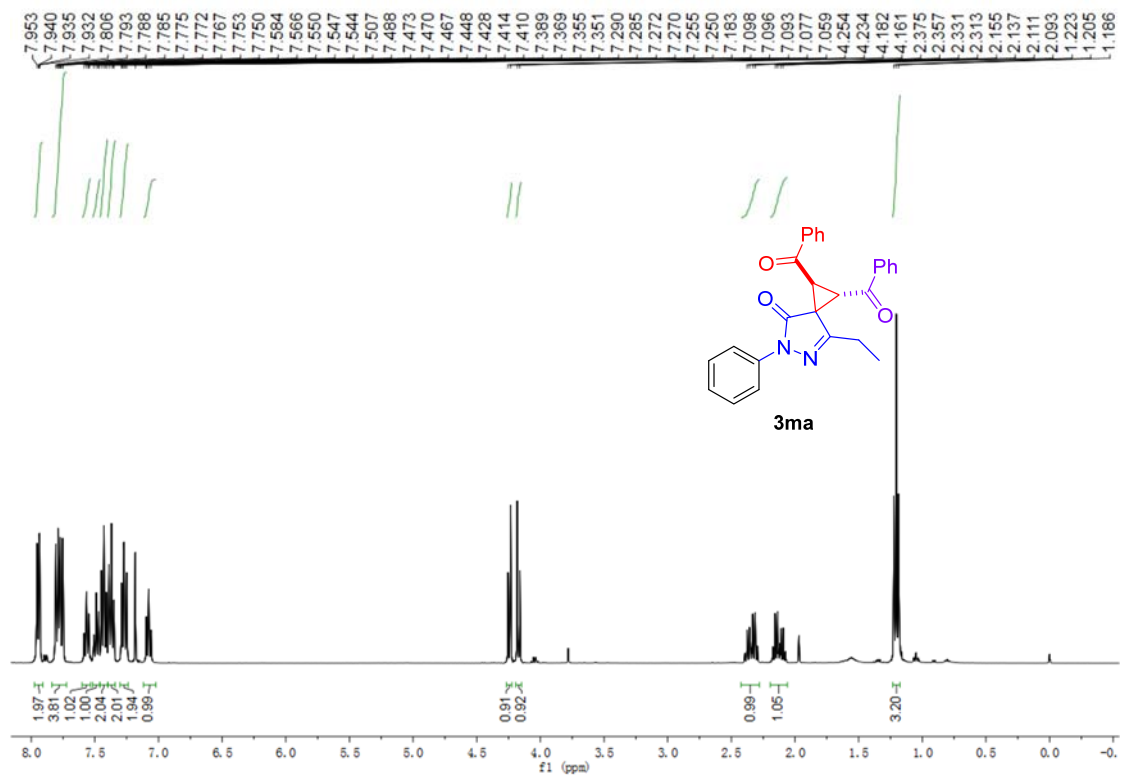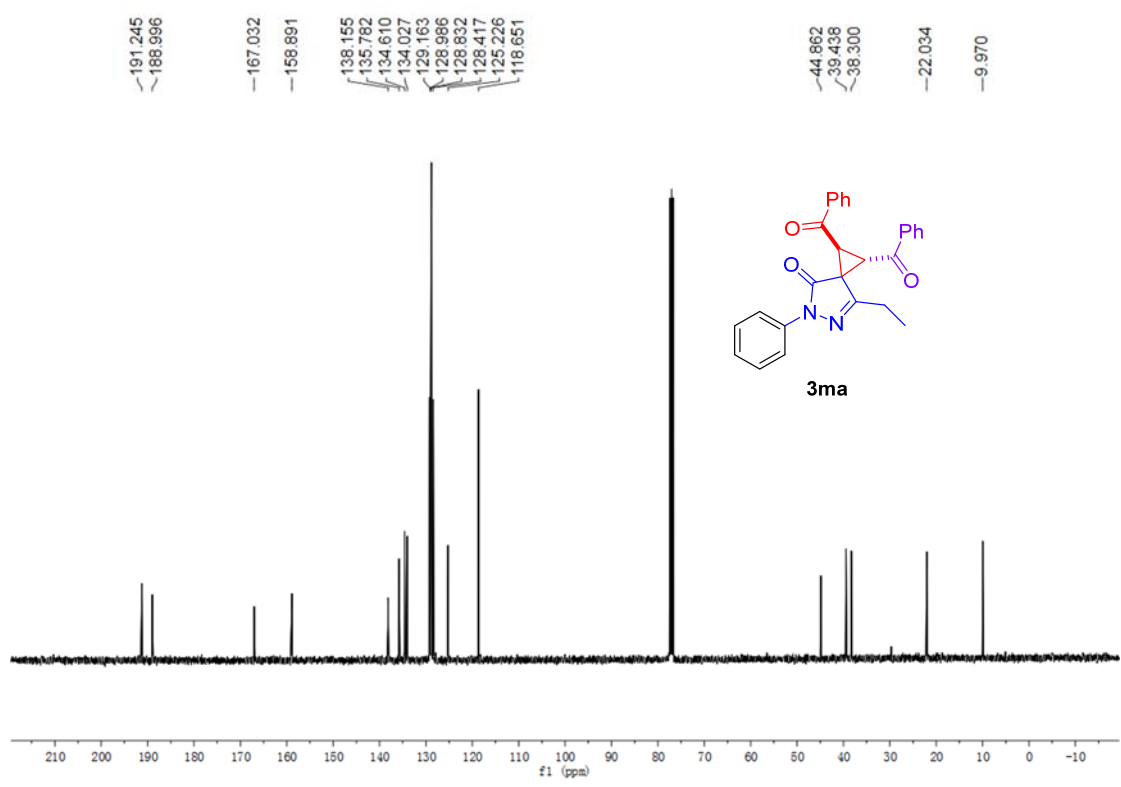

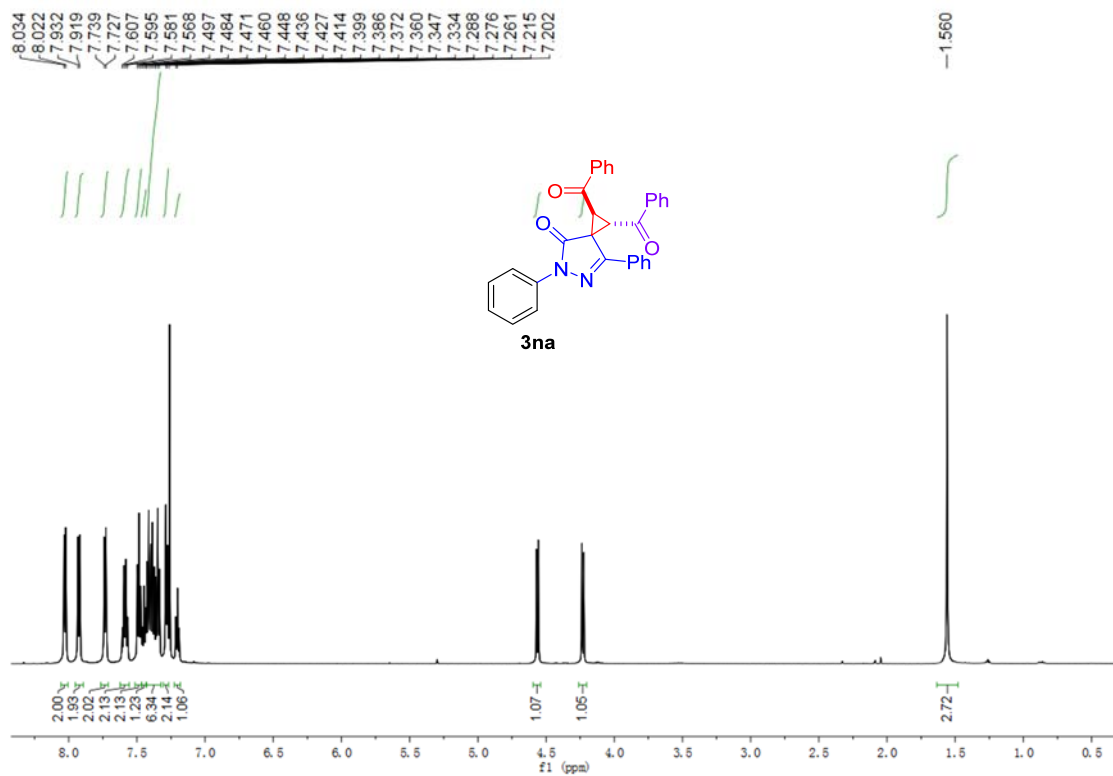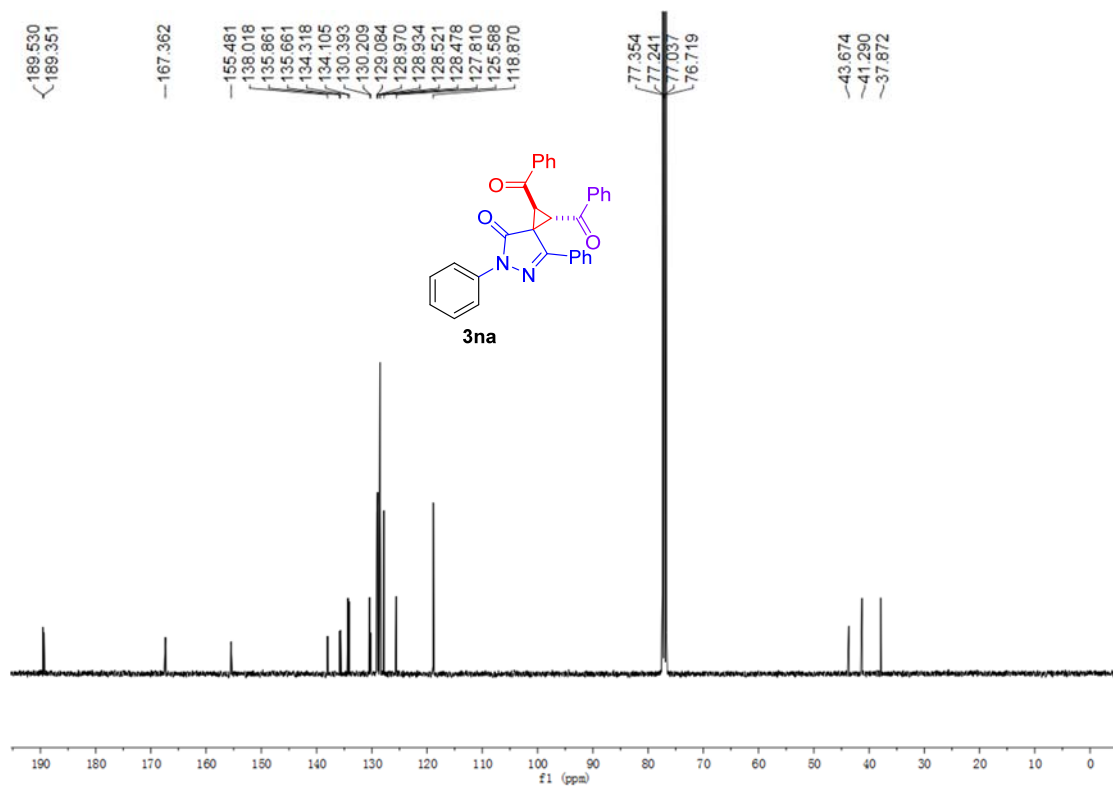

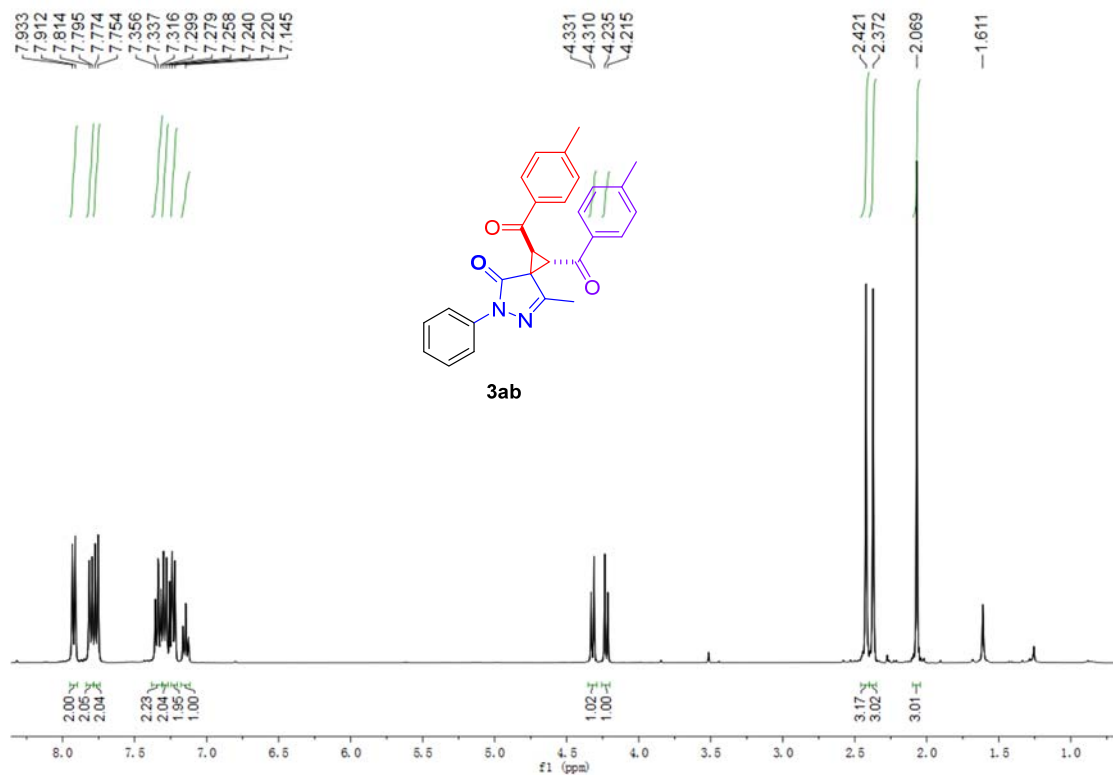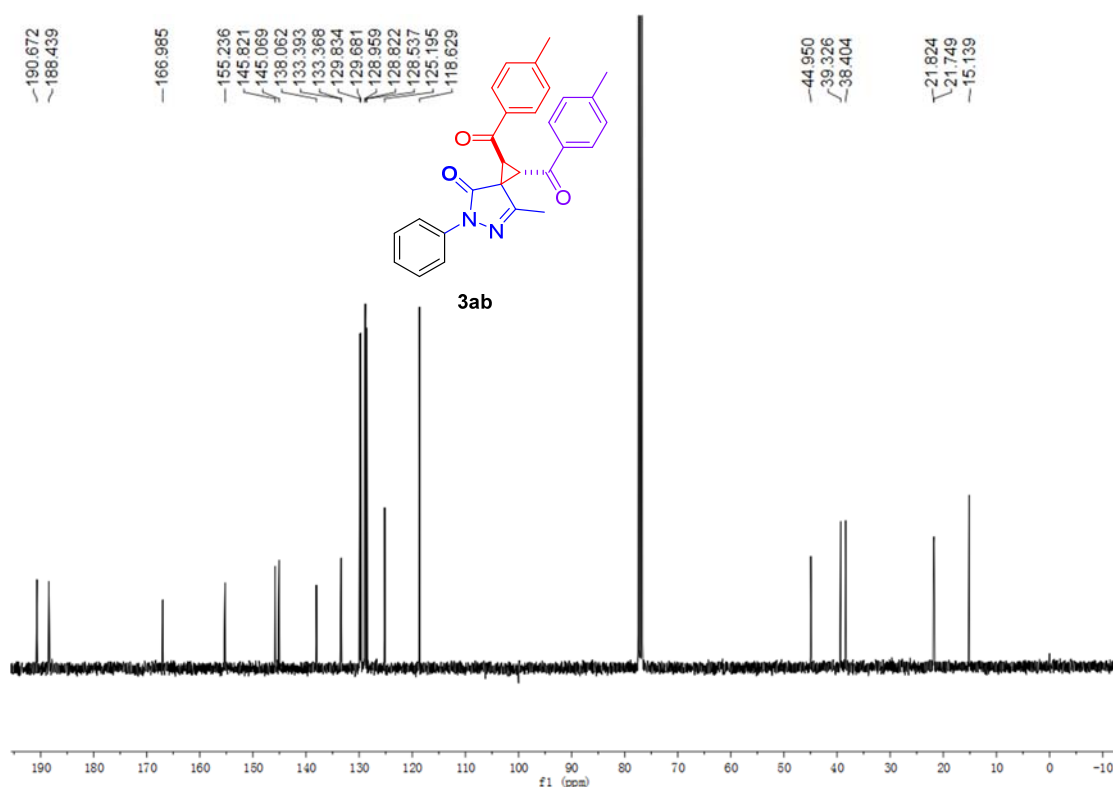



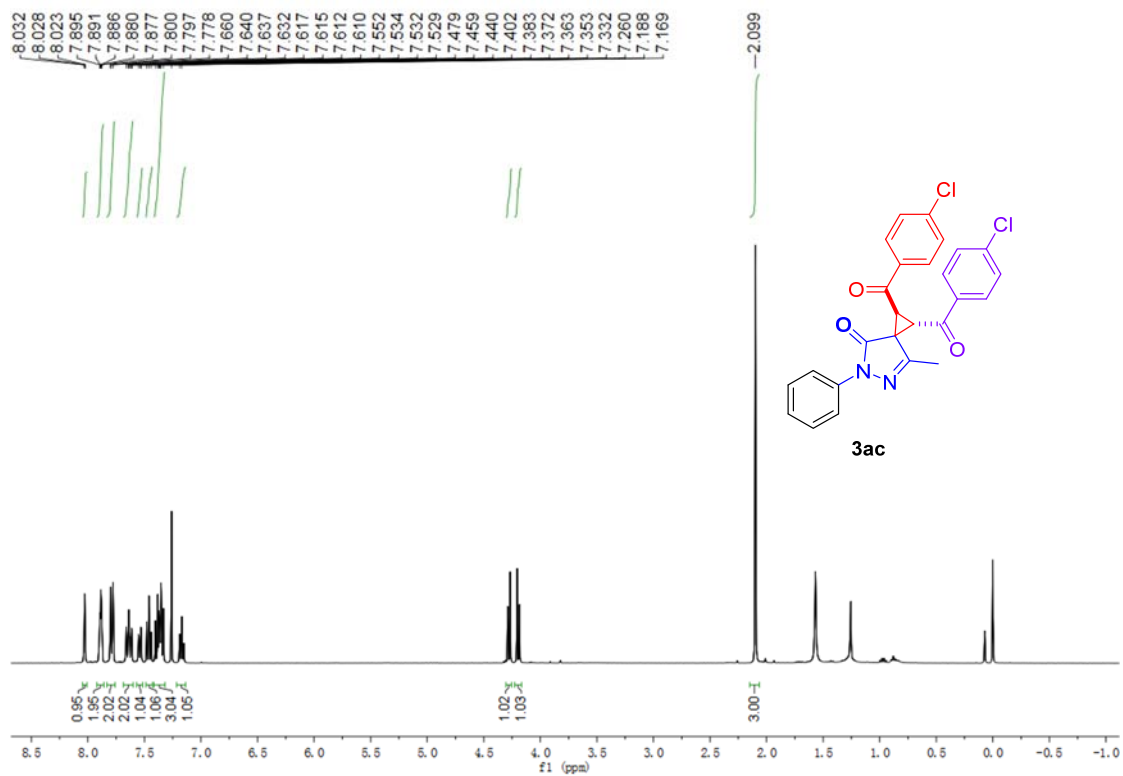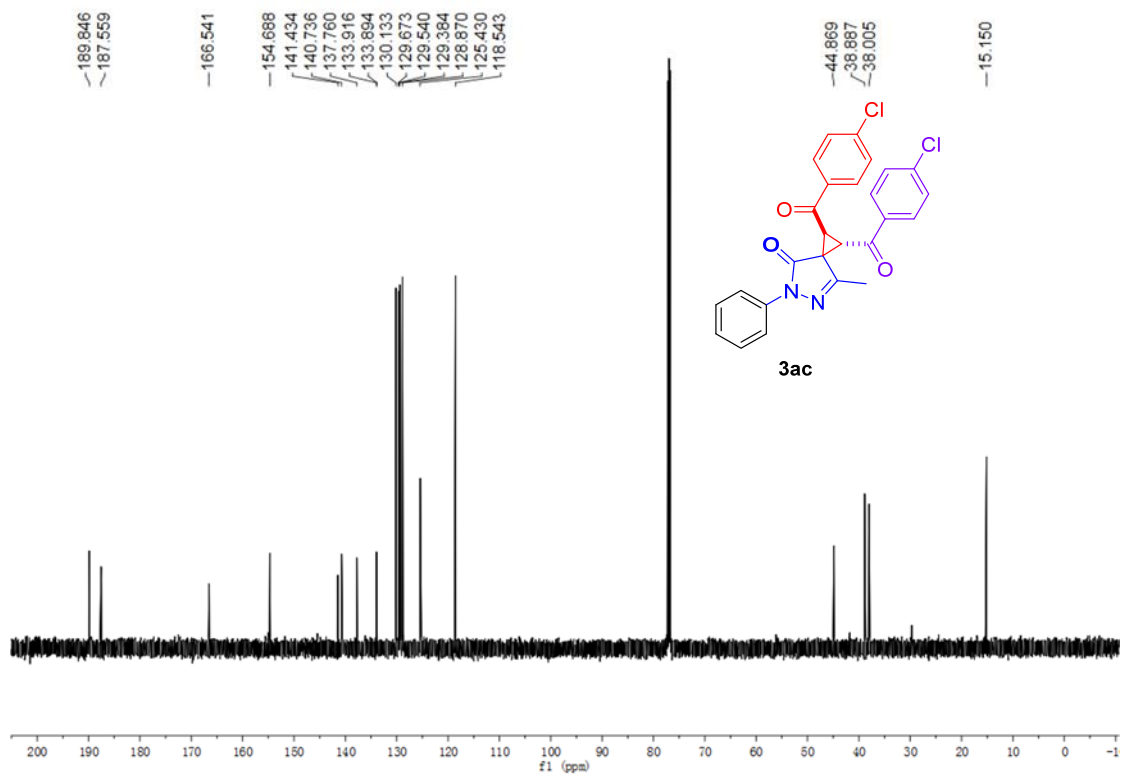

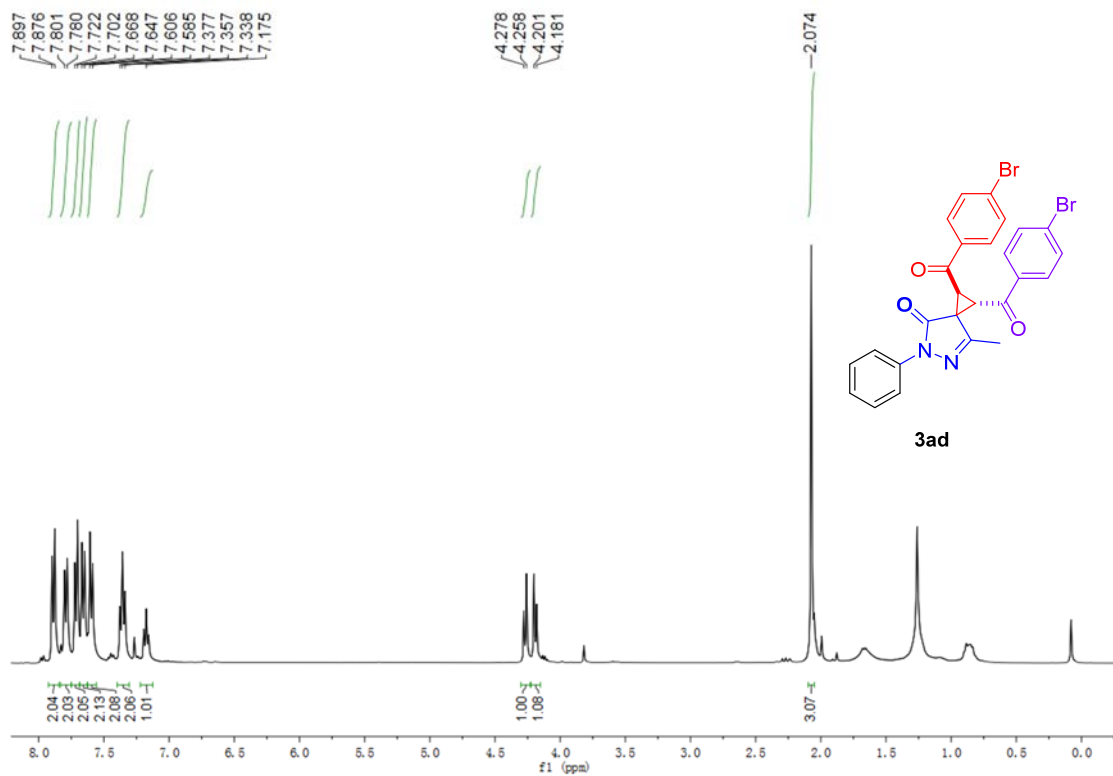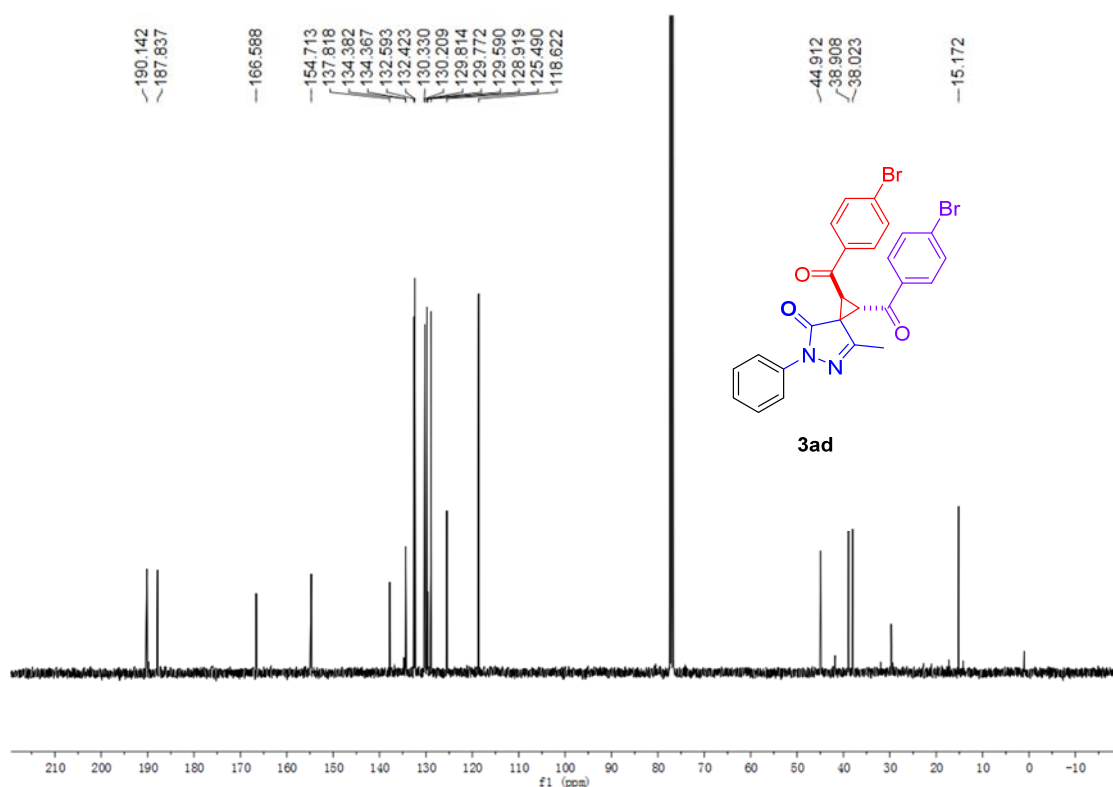

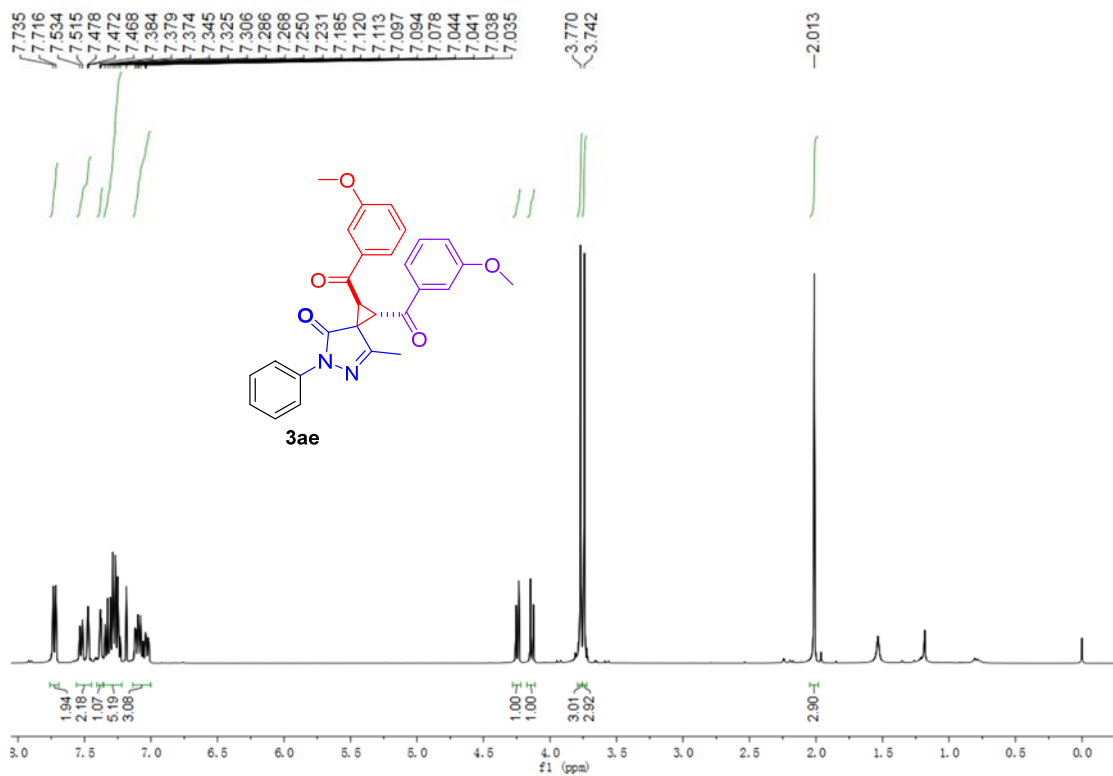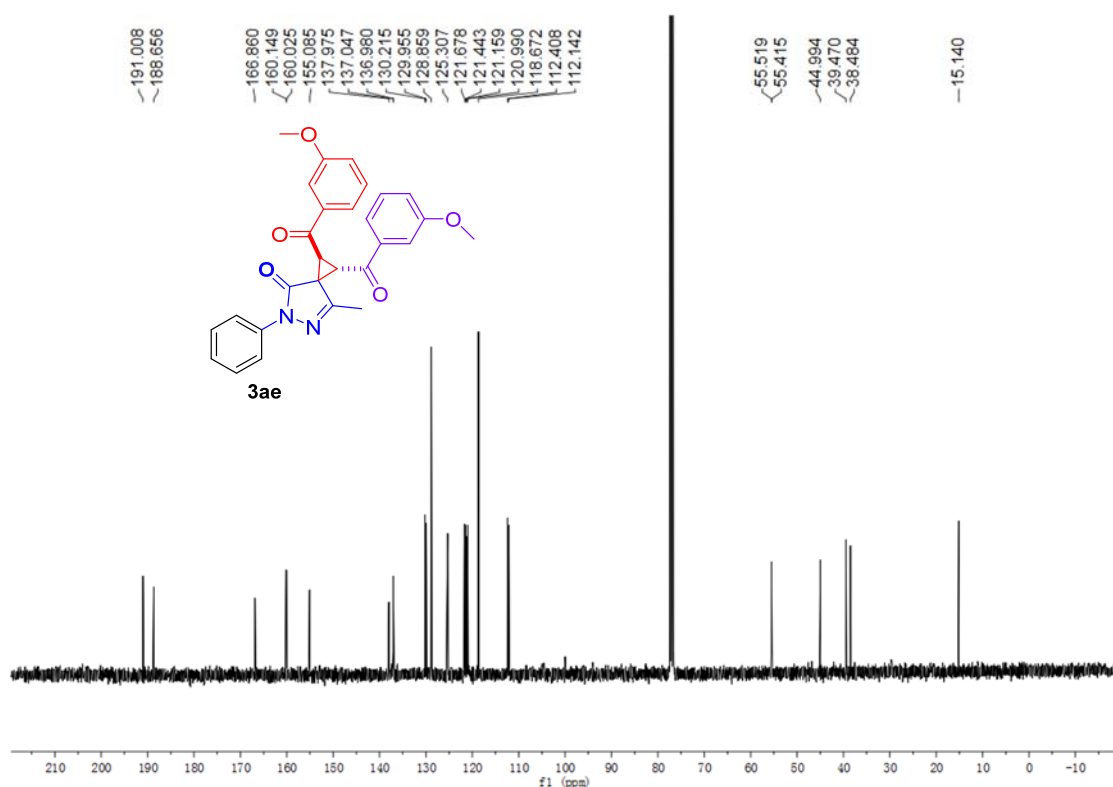

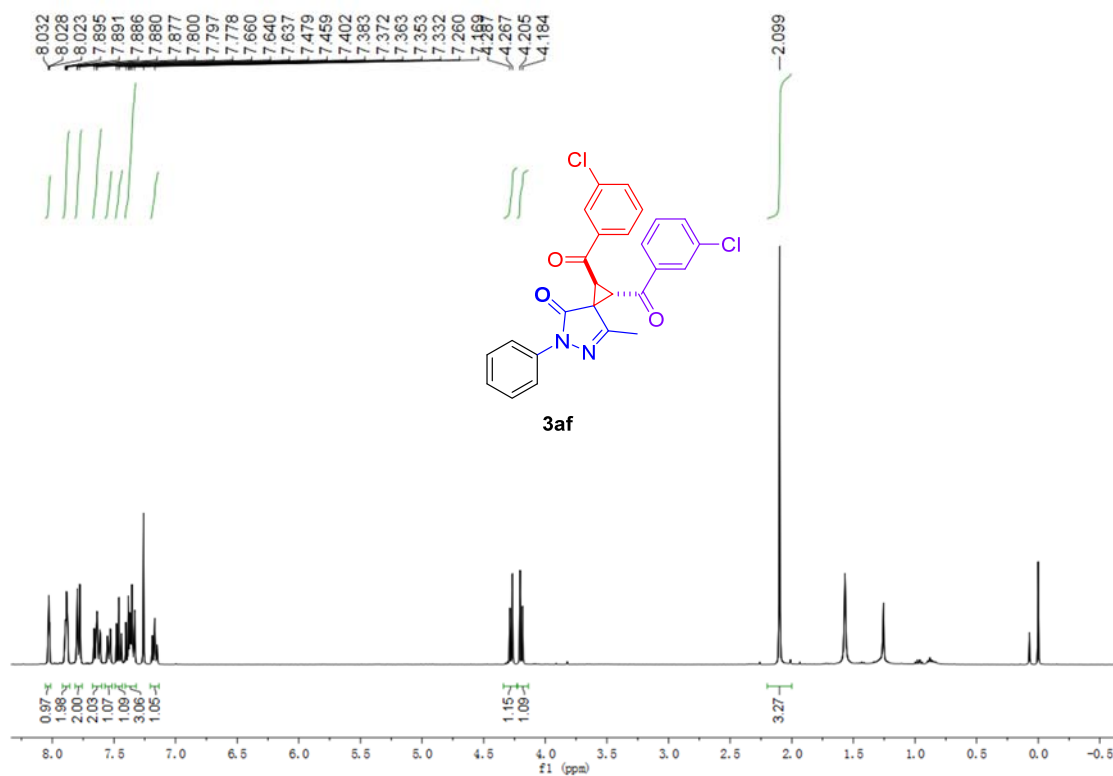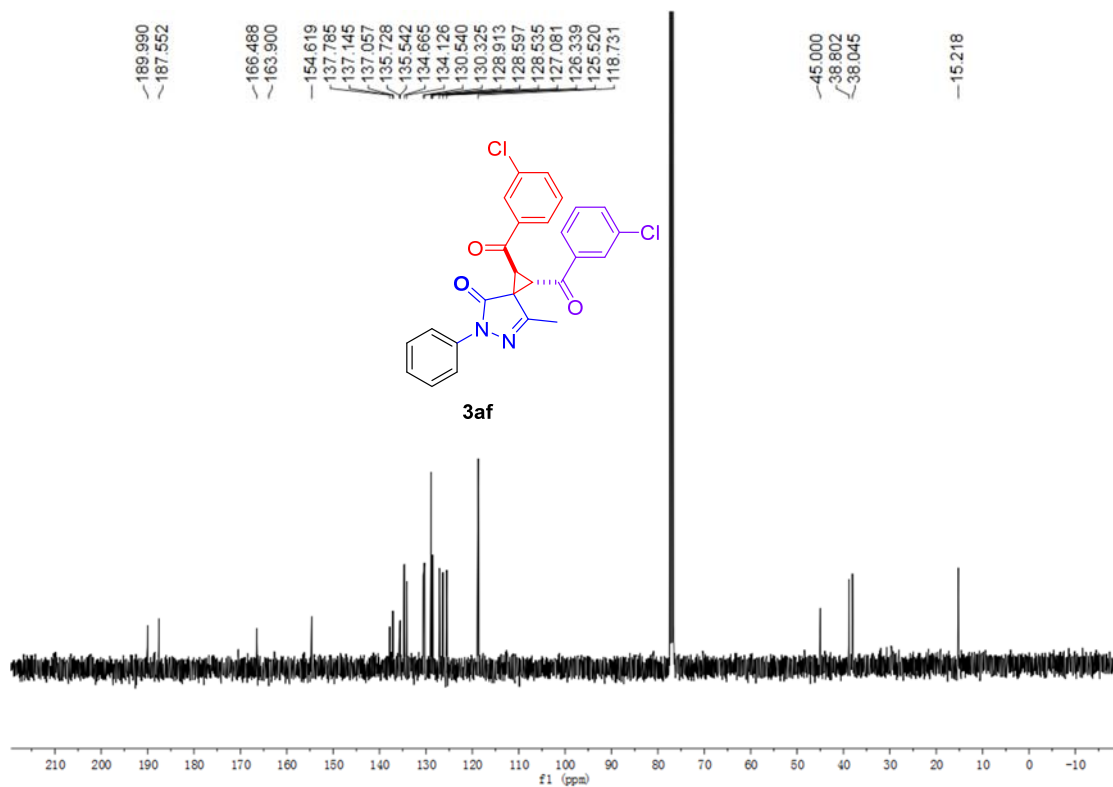

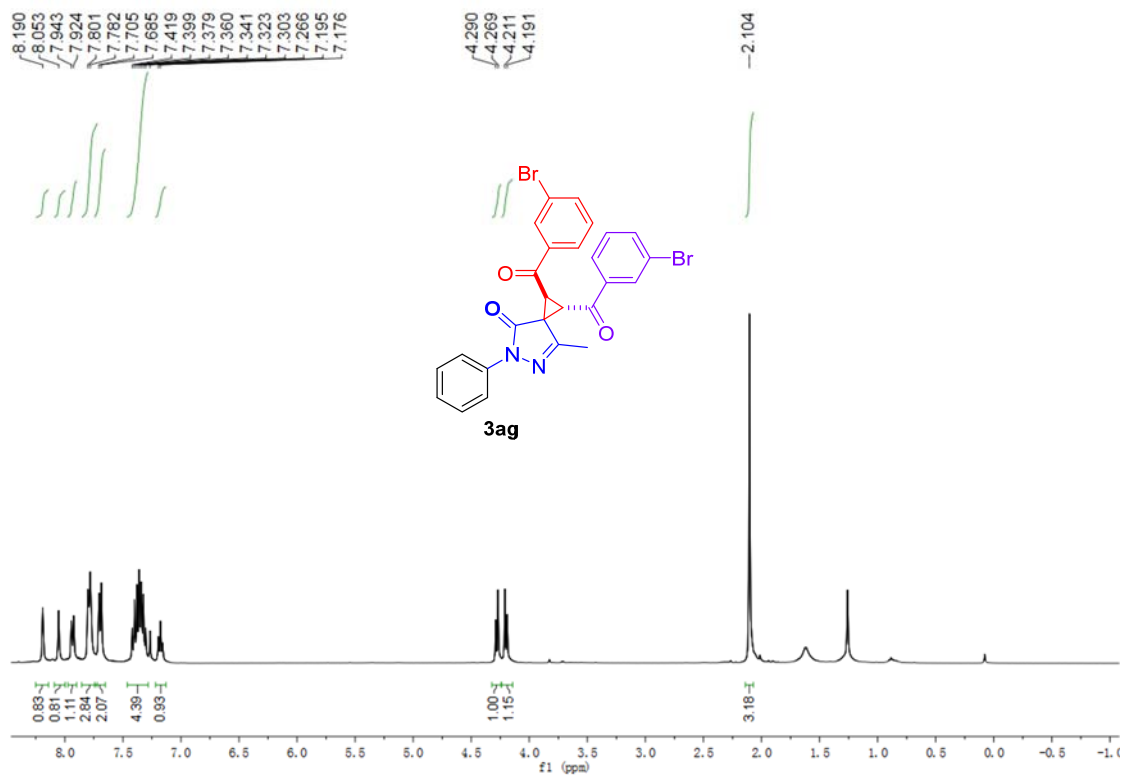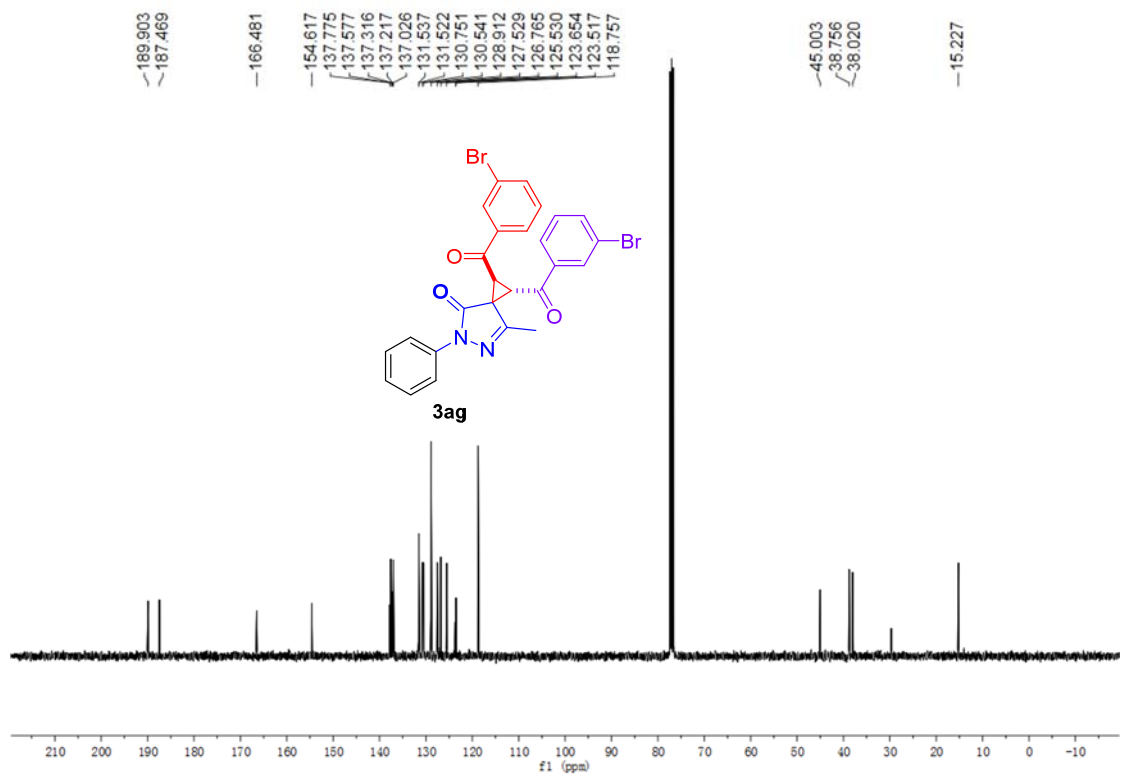

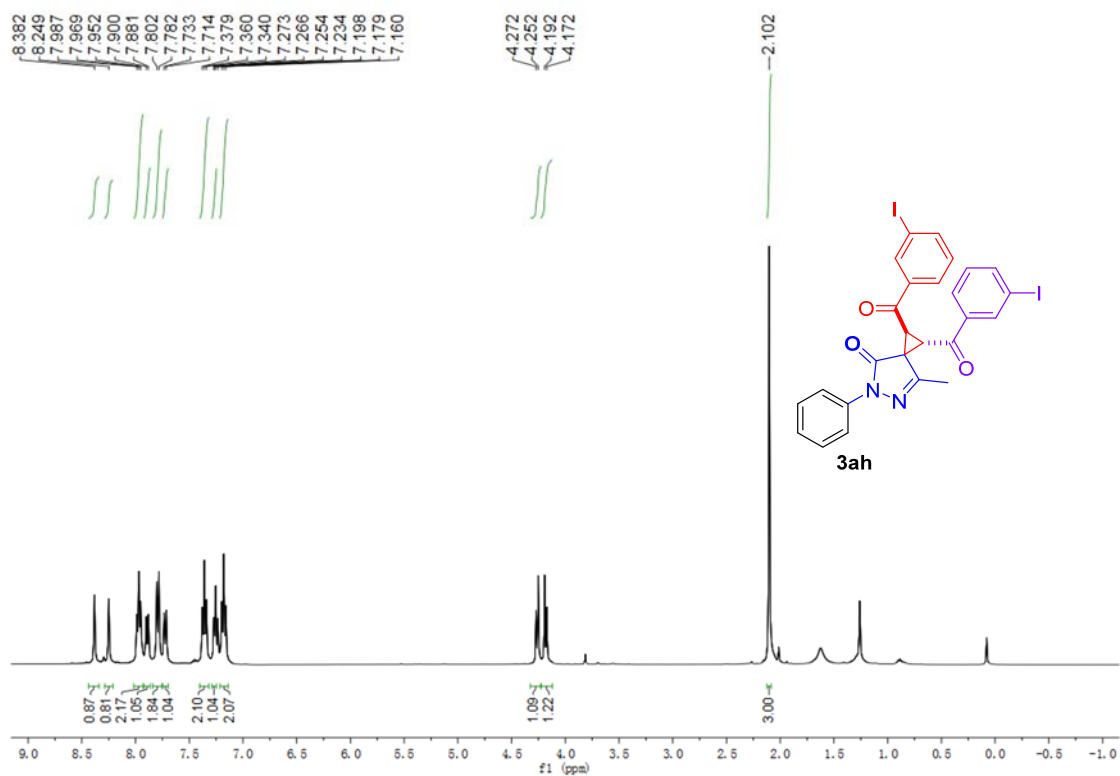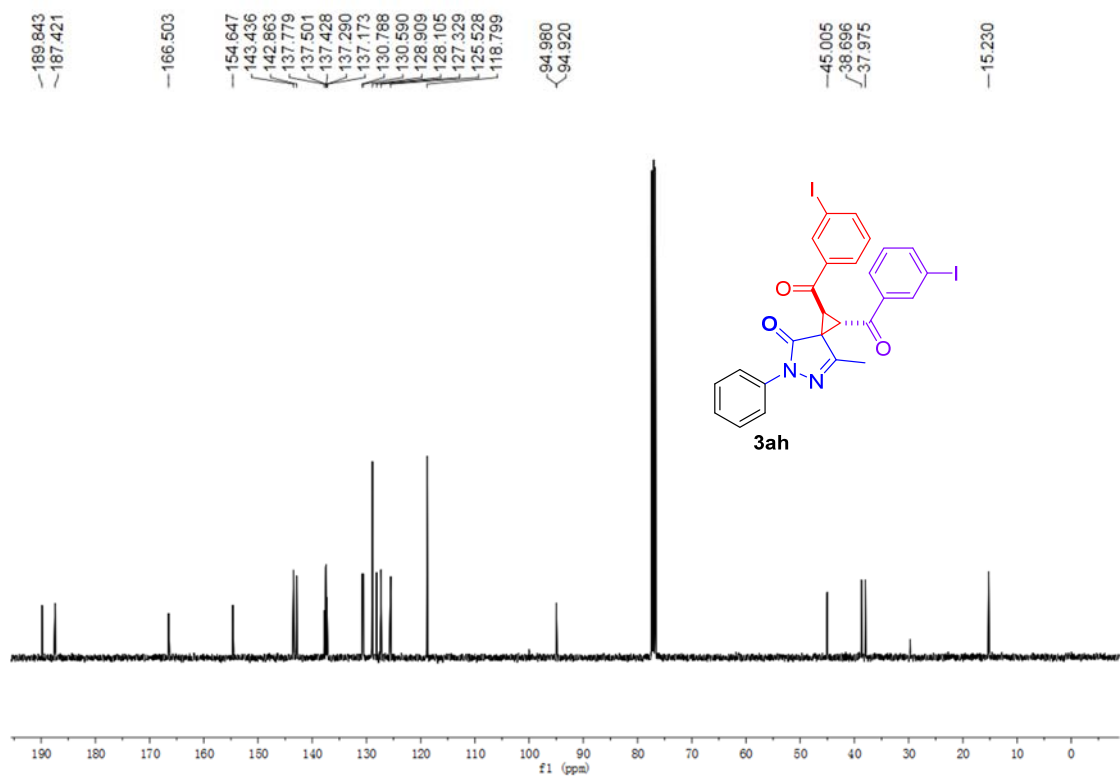

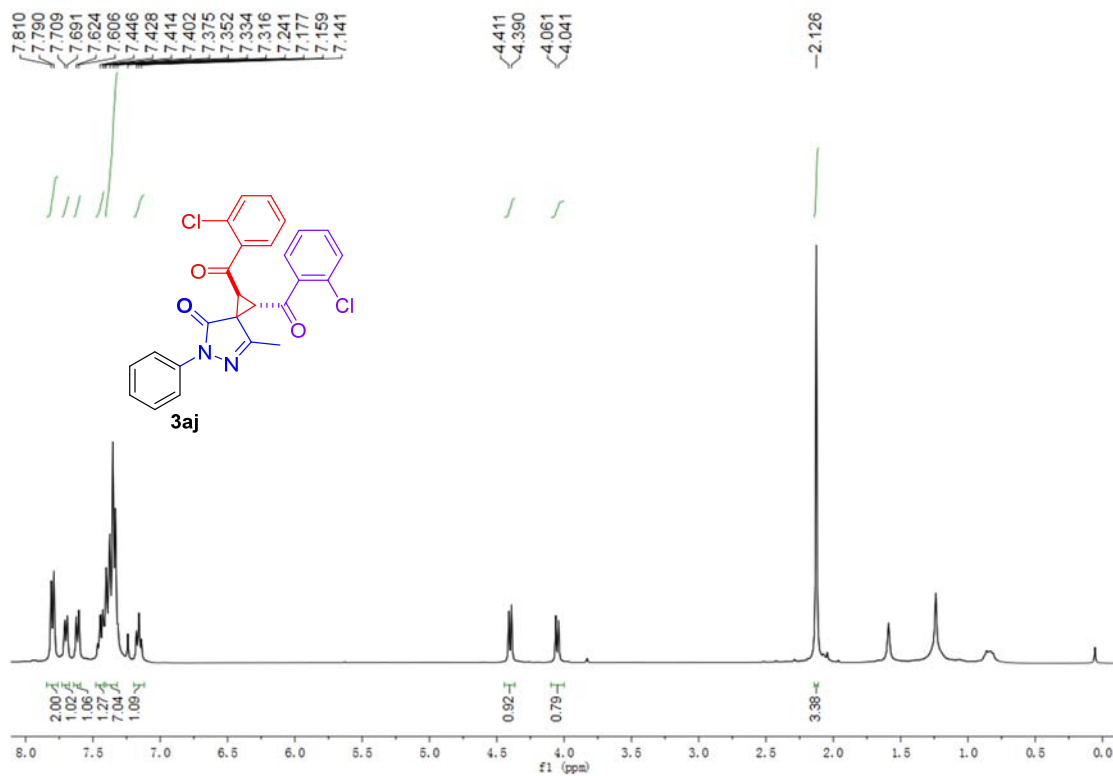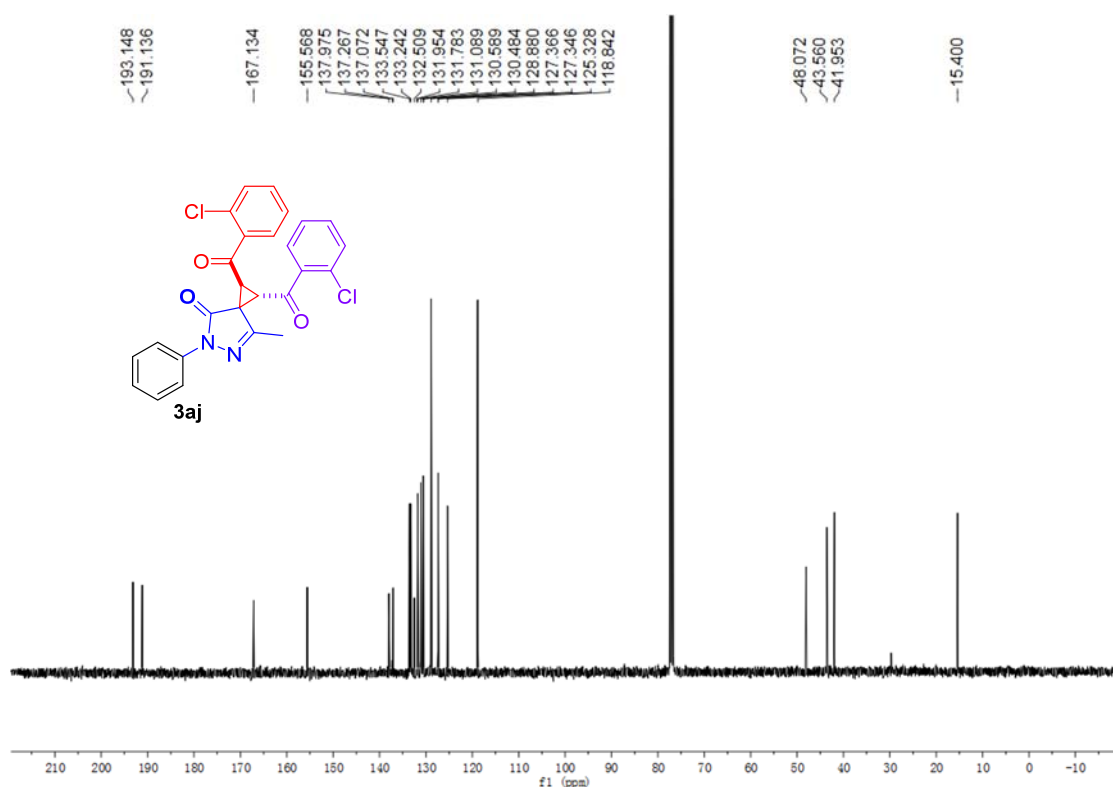

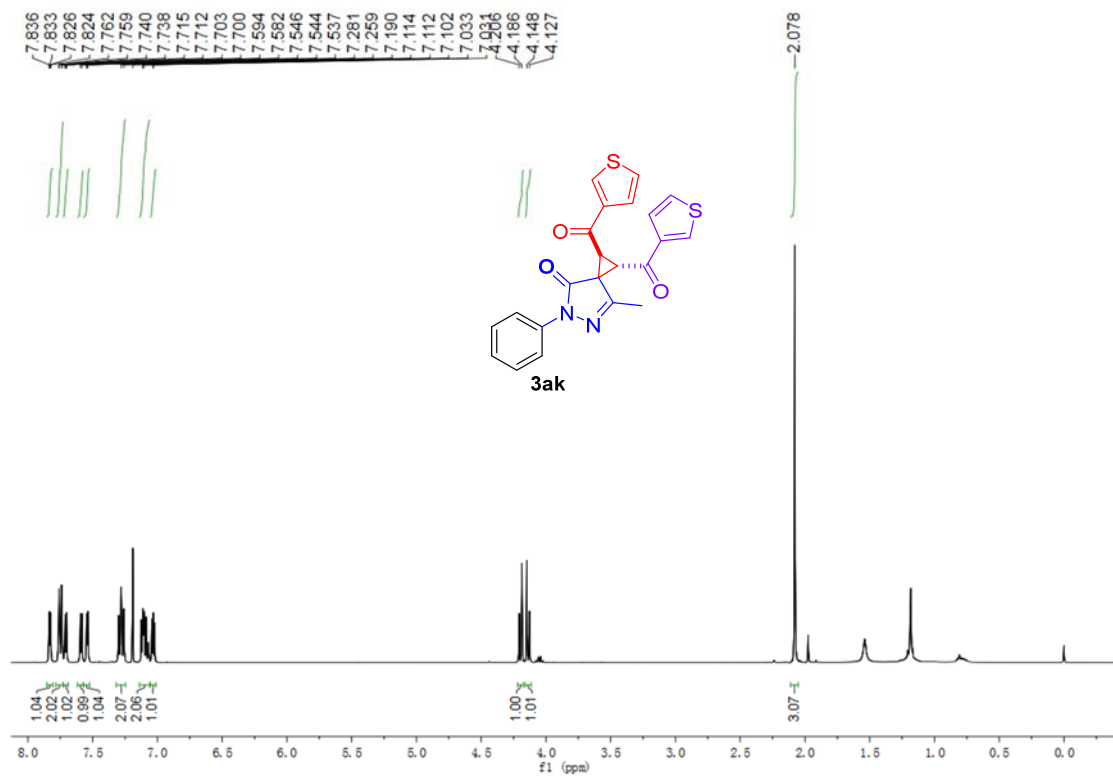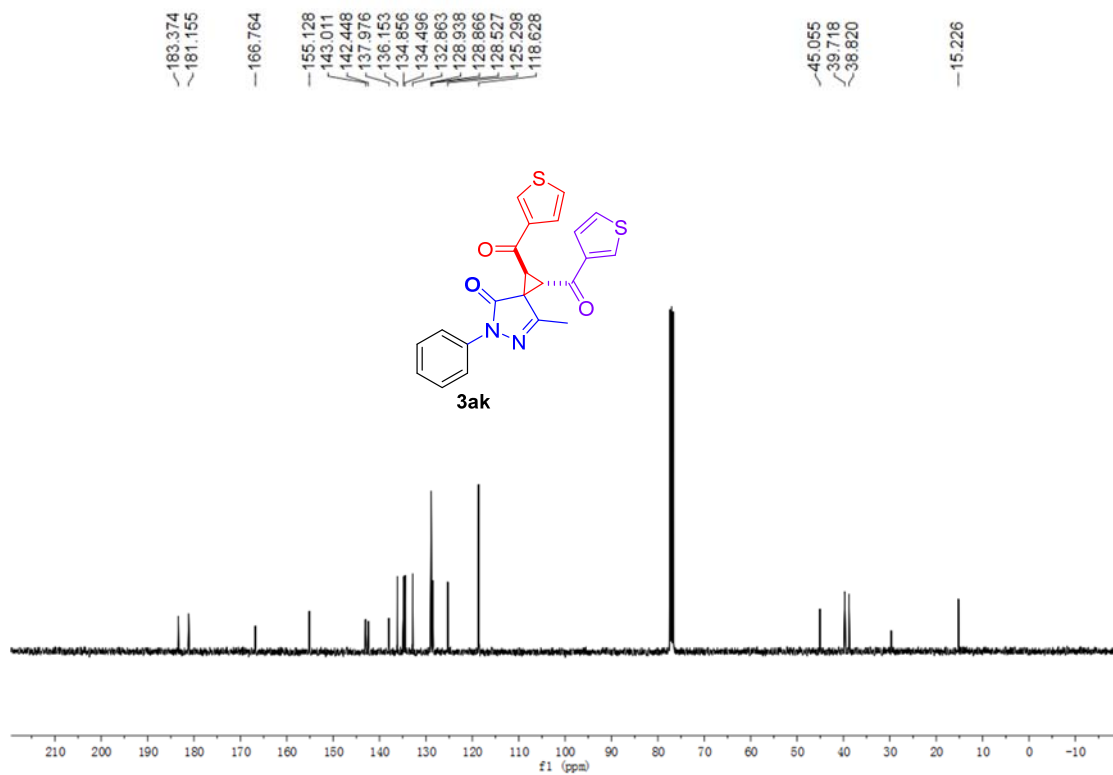



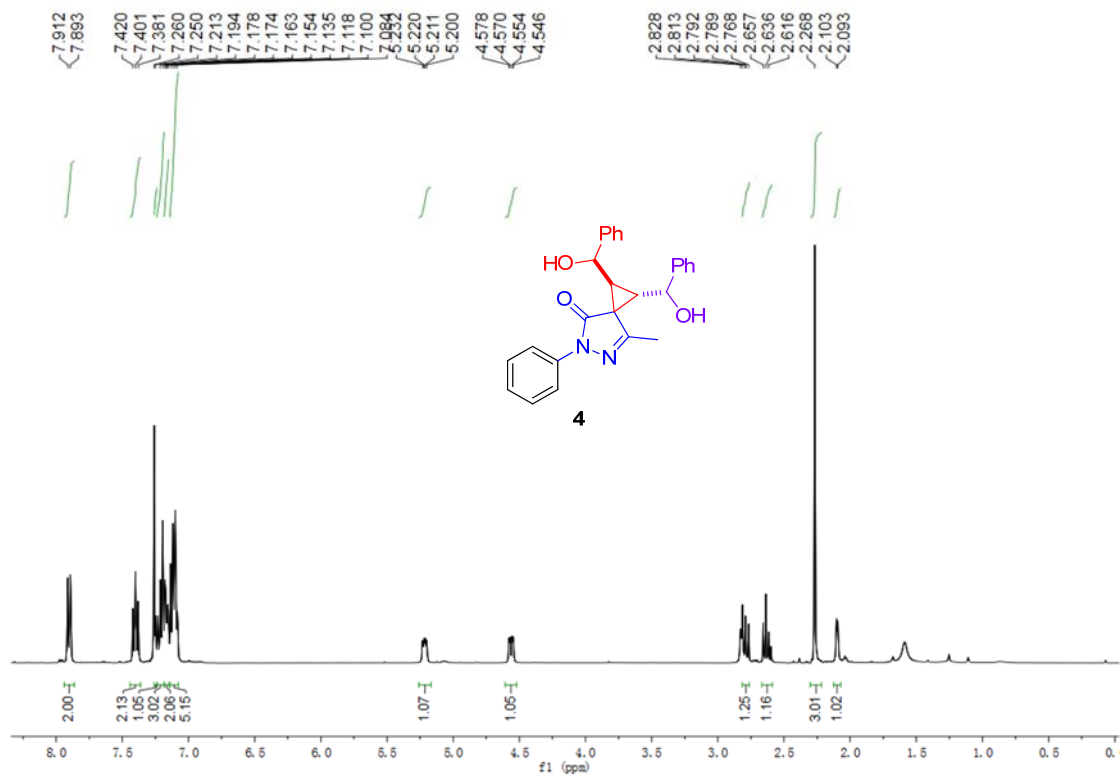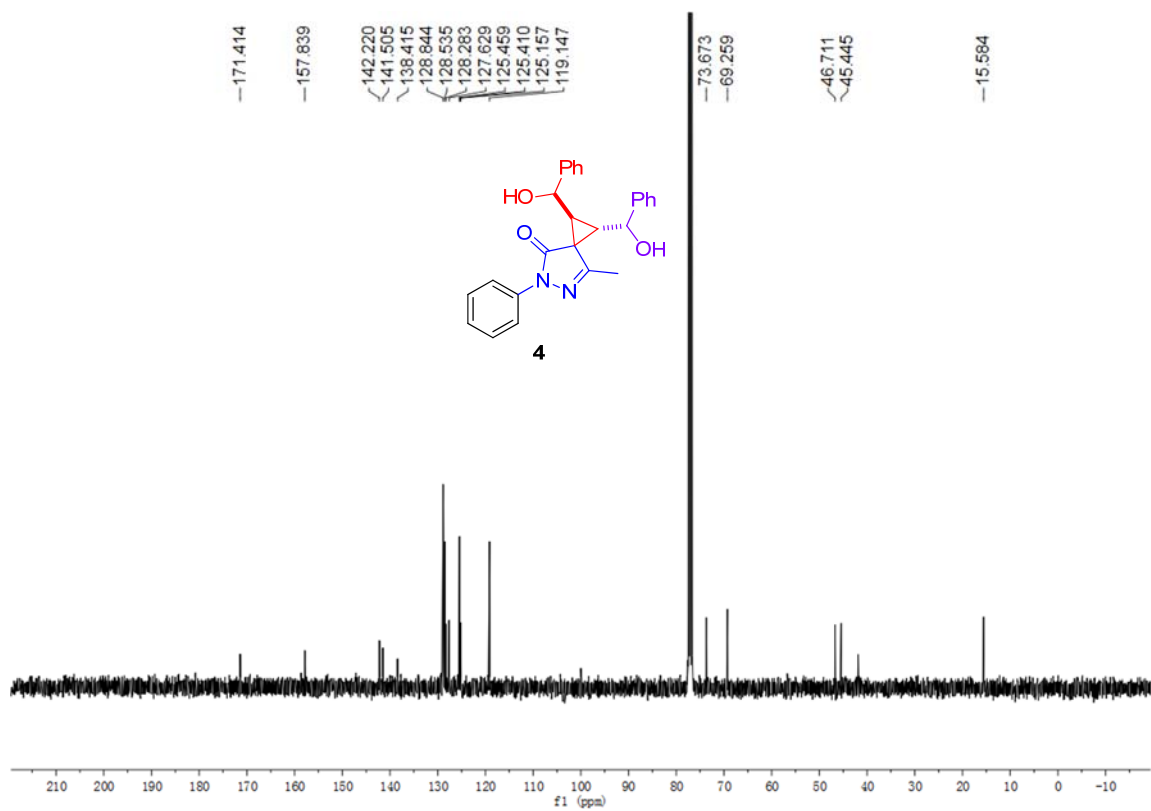

Supplement: c8qo01378k1.pdf [file c8qo01378k1.pdf]
